# Supplementary material for: Chemical Synthesis and Biological Activities of Novel Pleuromutilin Derivatives with Substituted Amino Moiety
Source: PubMed Central journal article supplement (PMC3871055; doi:10.1371/journal.pone.0082595), 2013-12-23

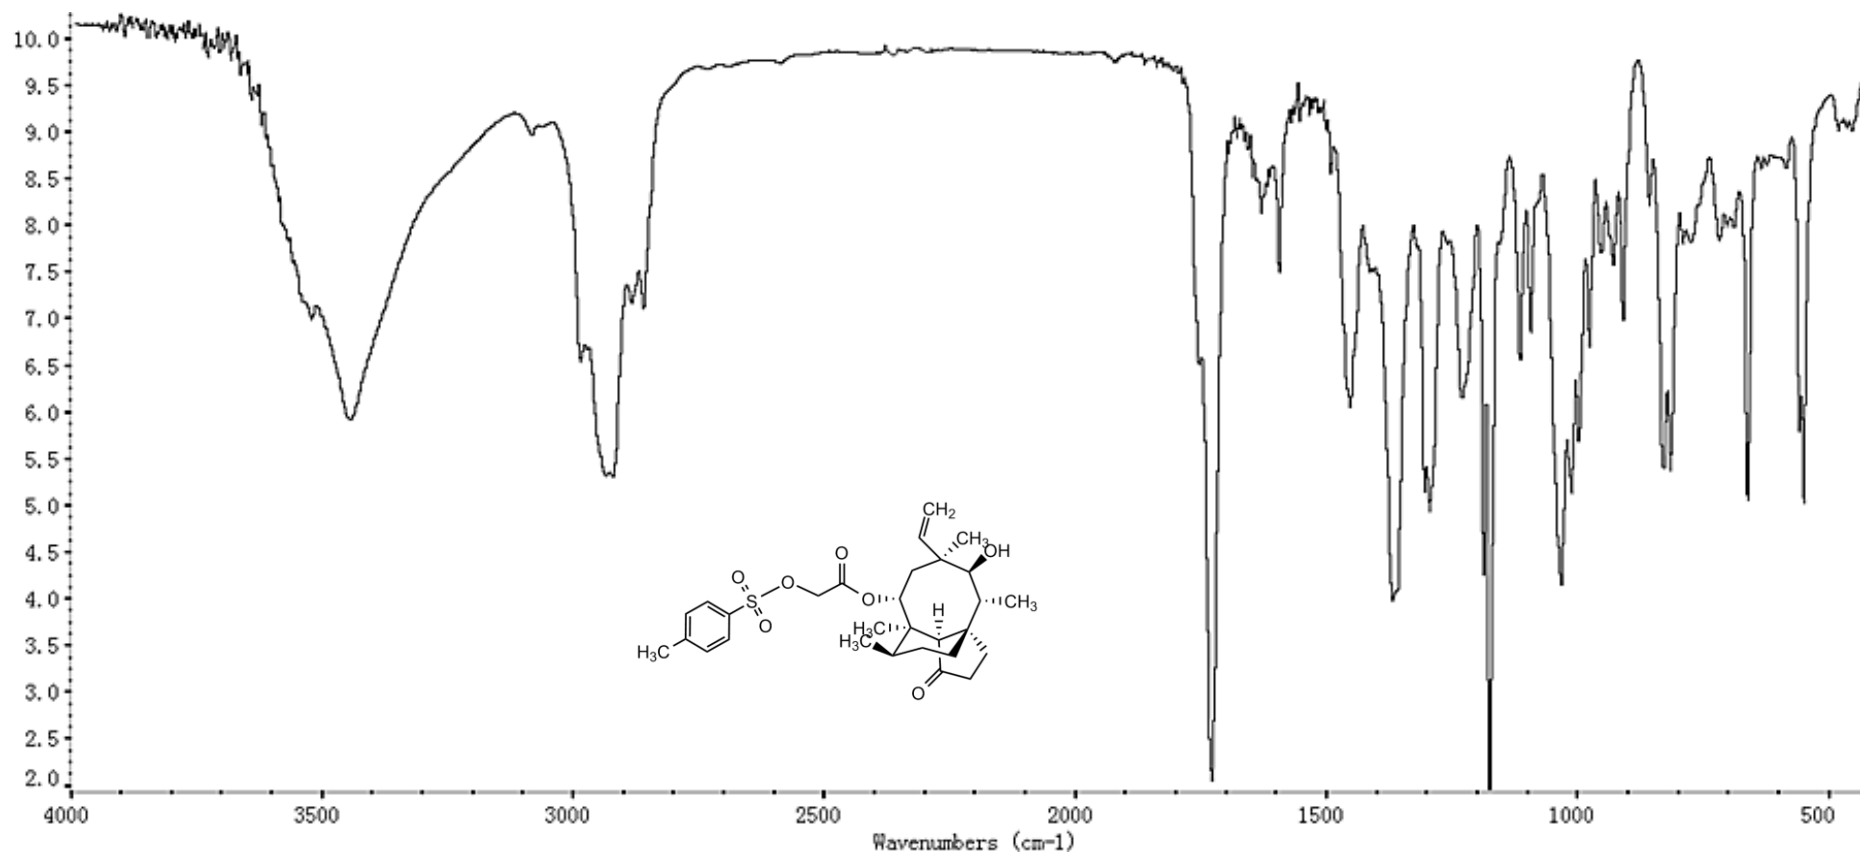

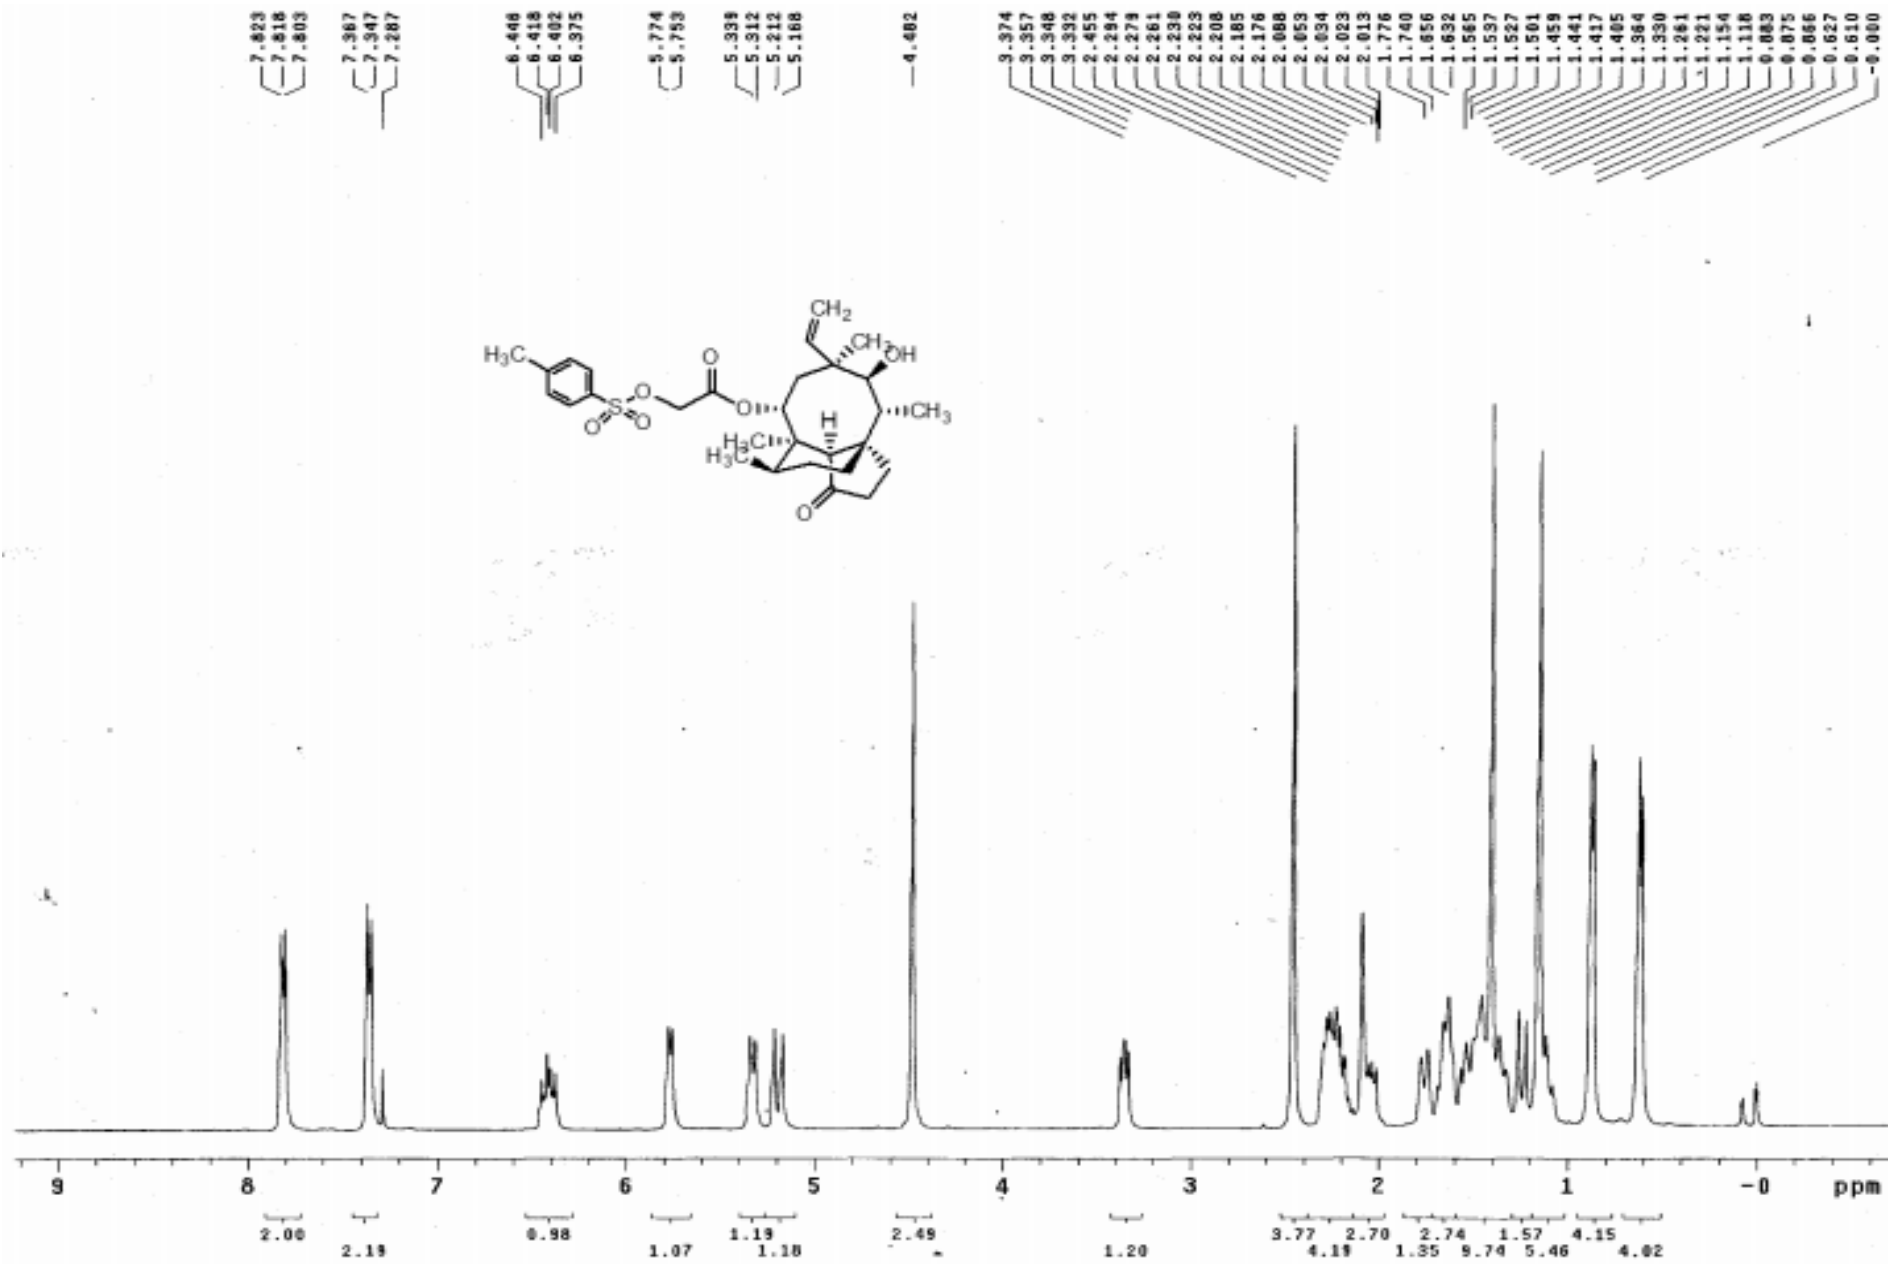

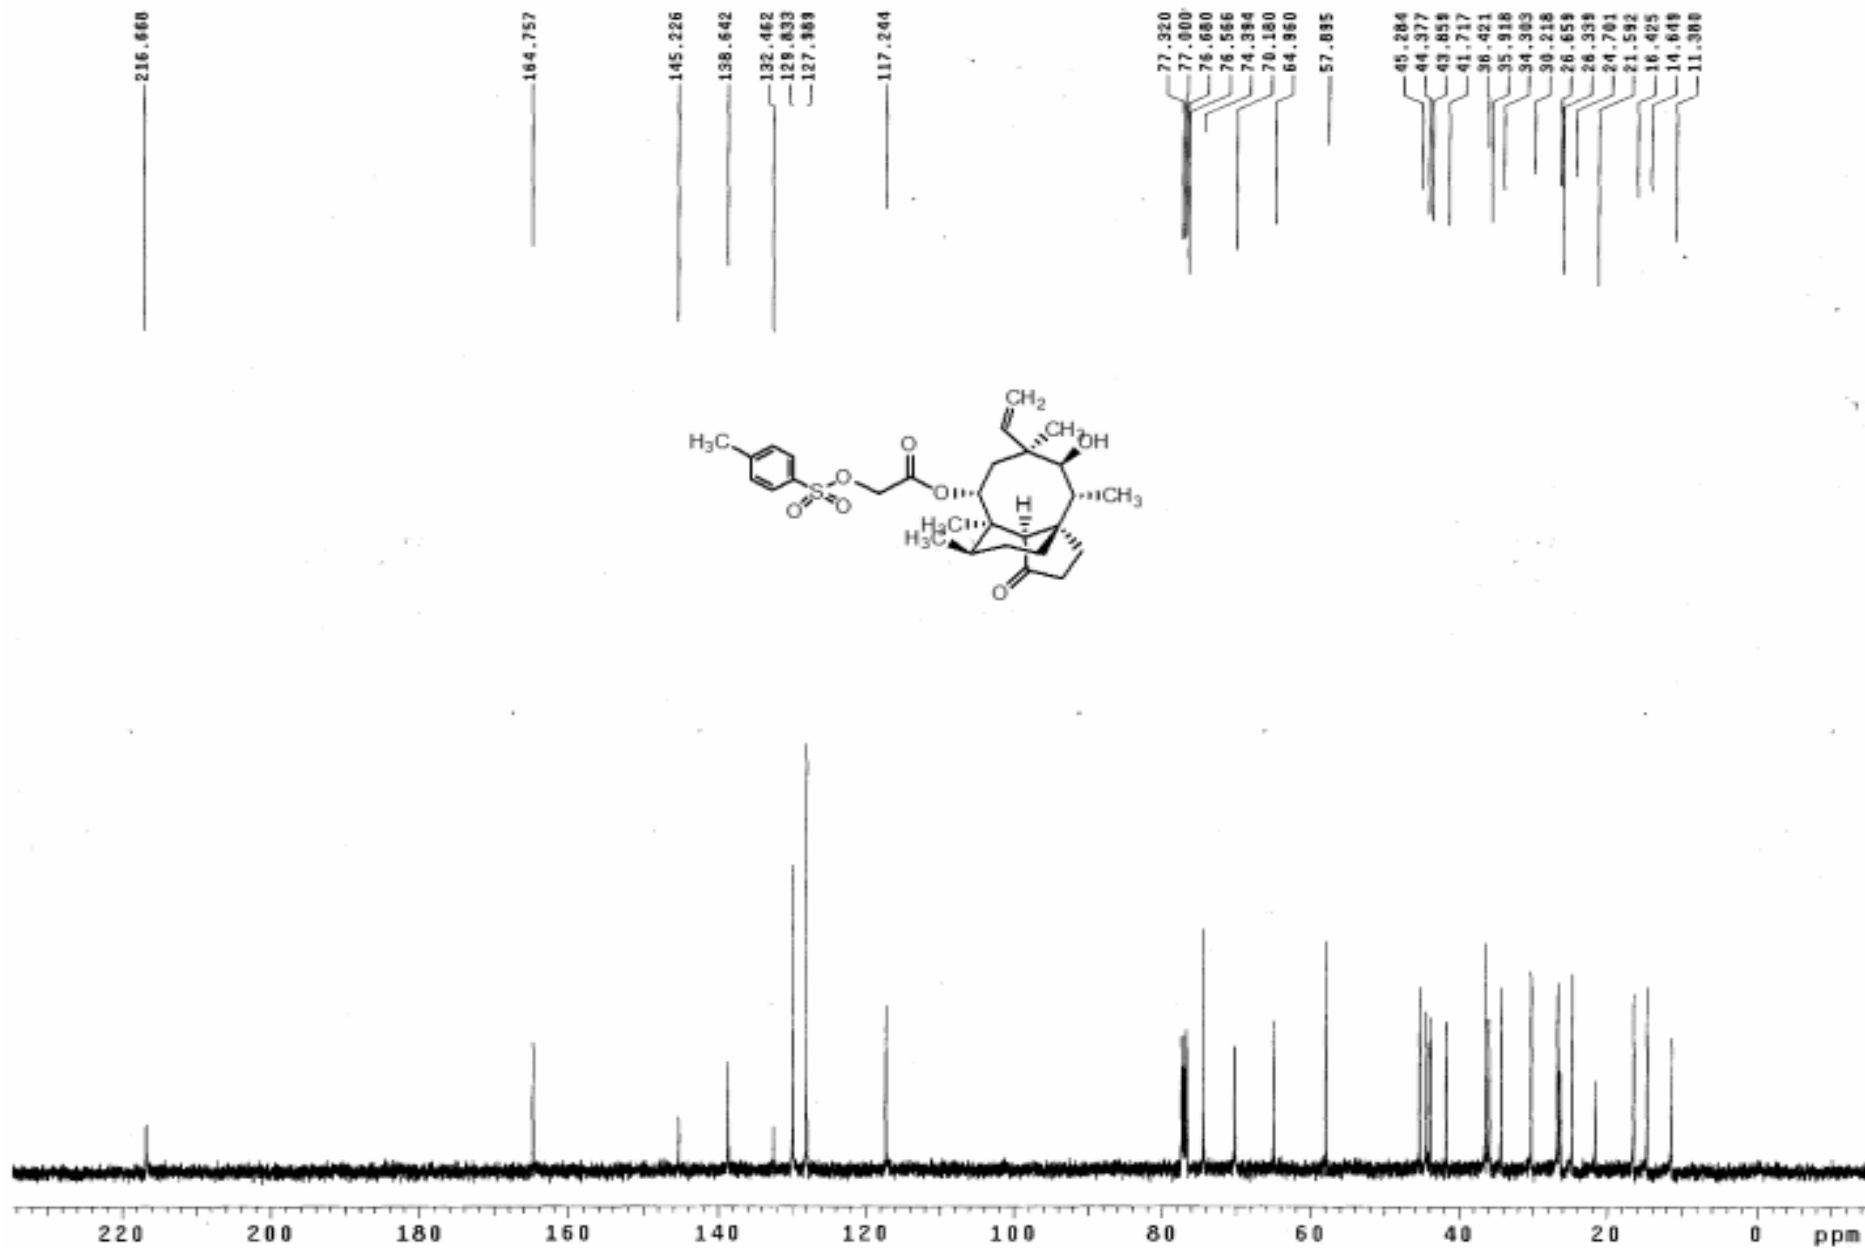

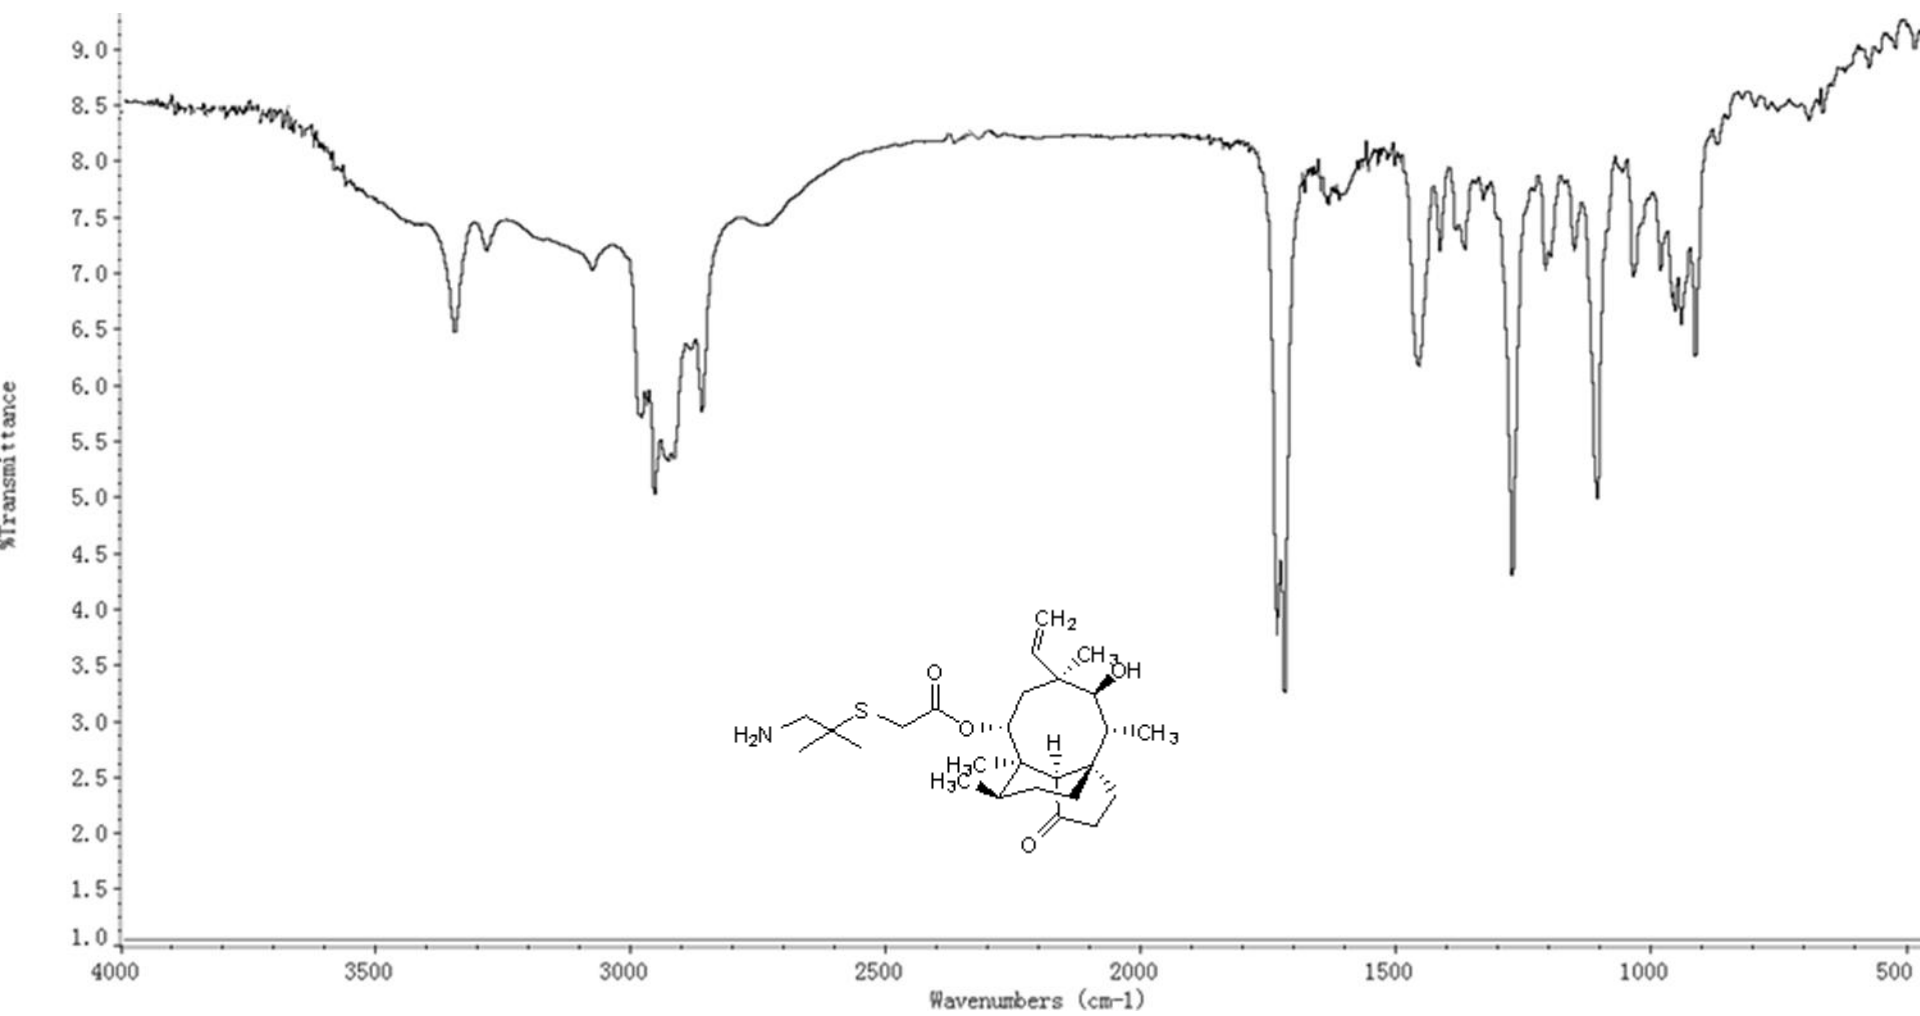

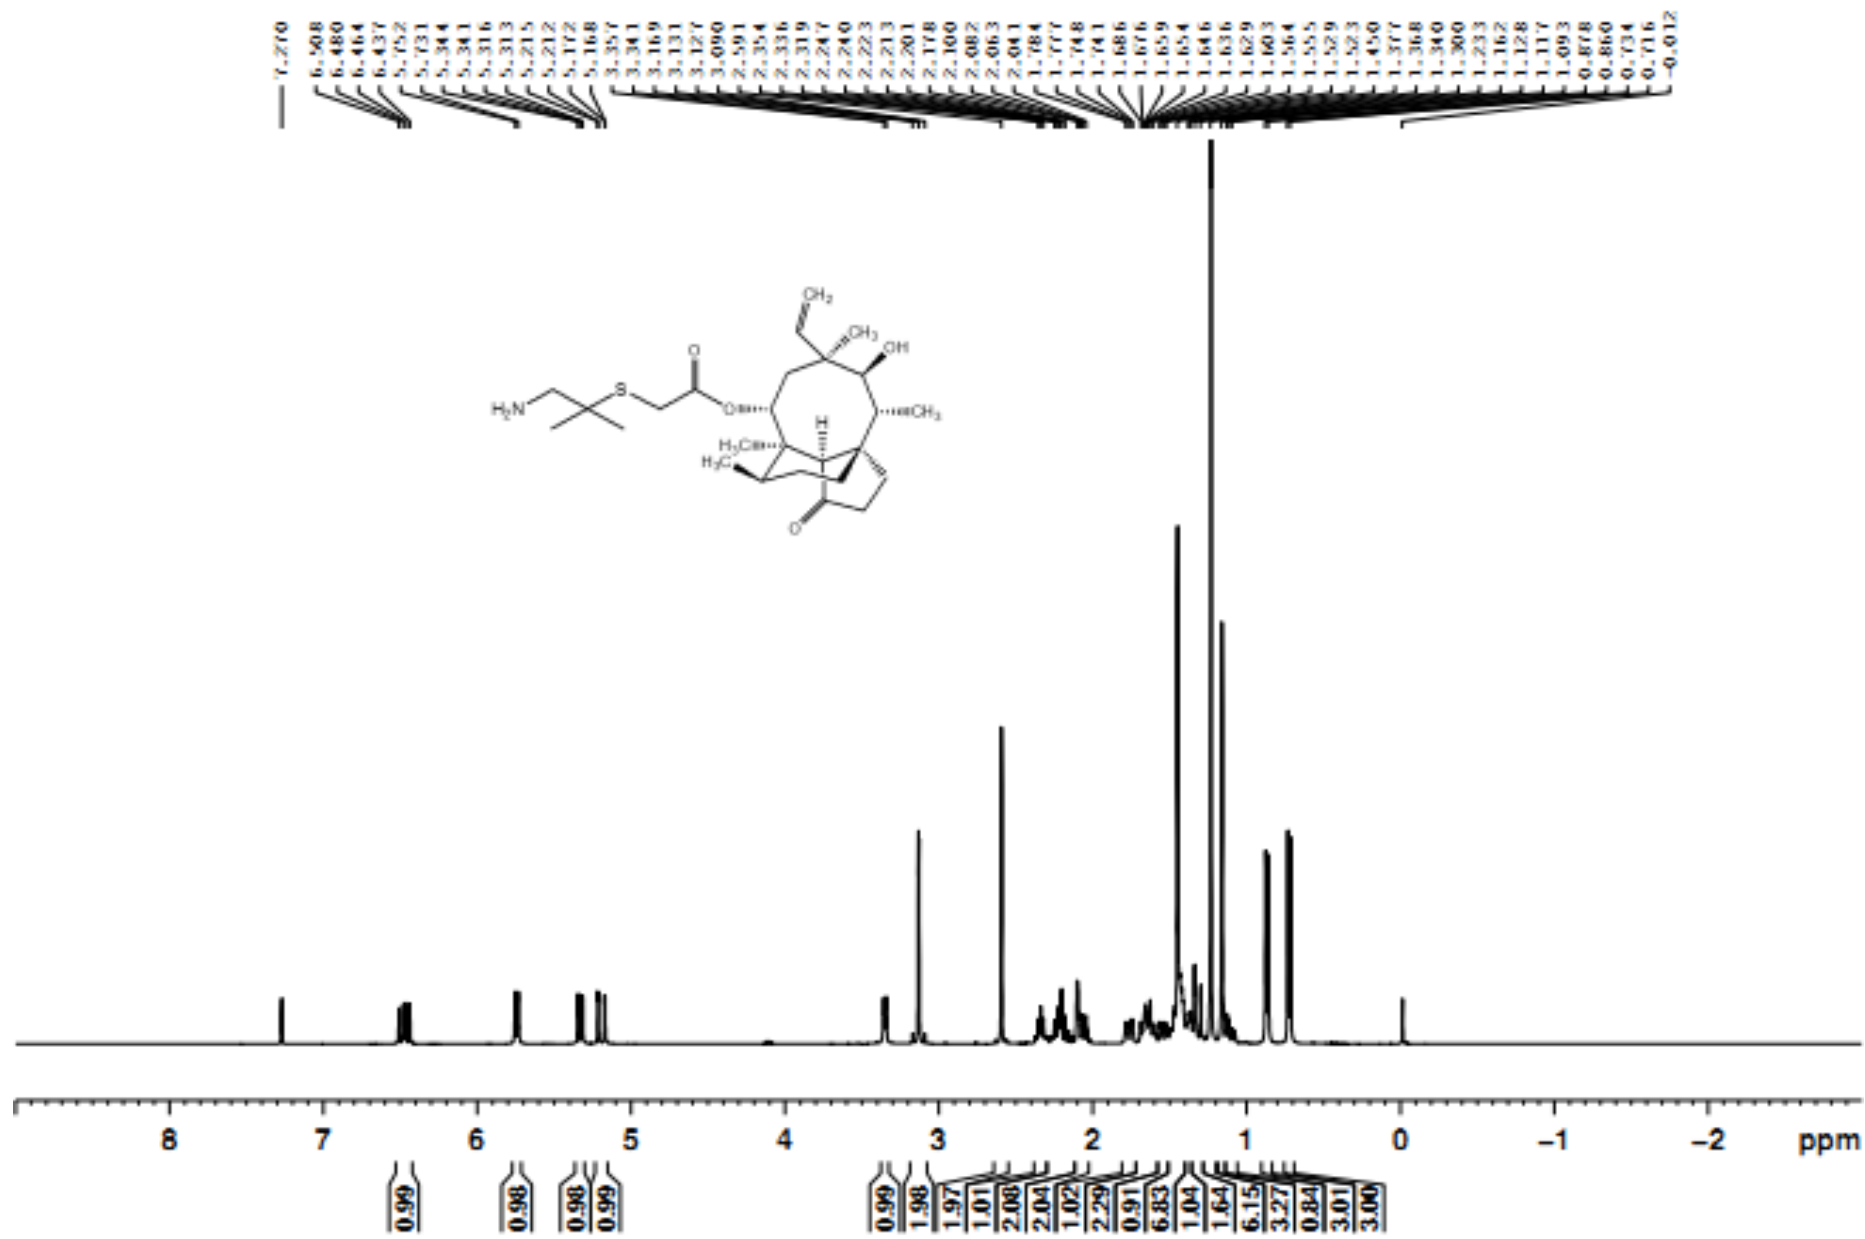

— 216.923

— 169.357

— 139.042

— 117.133

77.320  
77.002  
76.685  
74.573  
69.301

58.181  
51.700  
48.502  
45.422  
44.720  
43.898  
41.763  
36.745  
35.990  
34.418  
31.211  
30.415  
26.819  
26.331  
26.242  
26.187  
24.817  
16.797  
14.881  
11.443

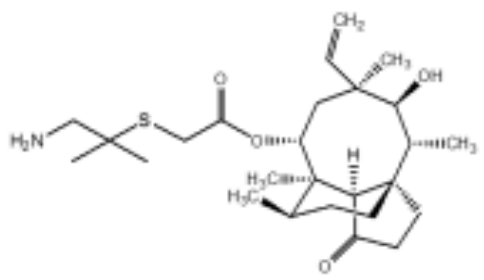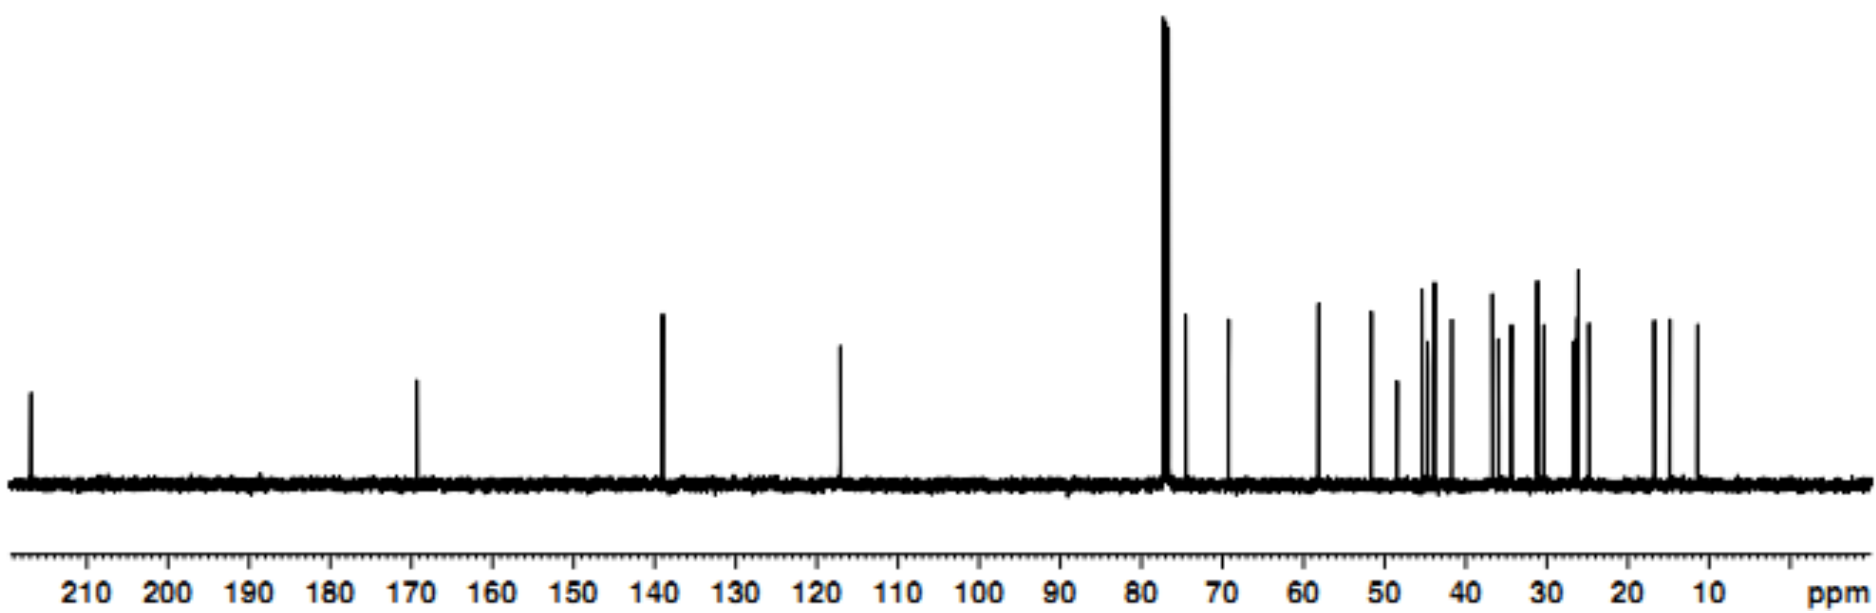

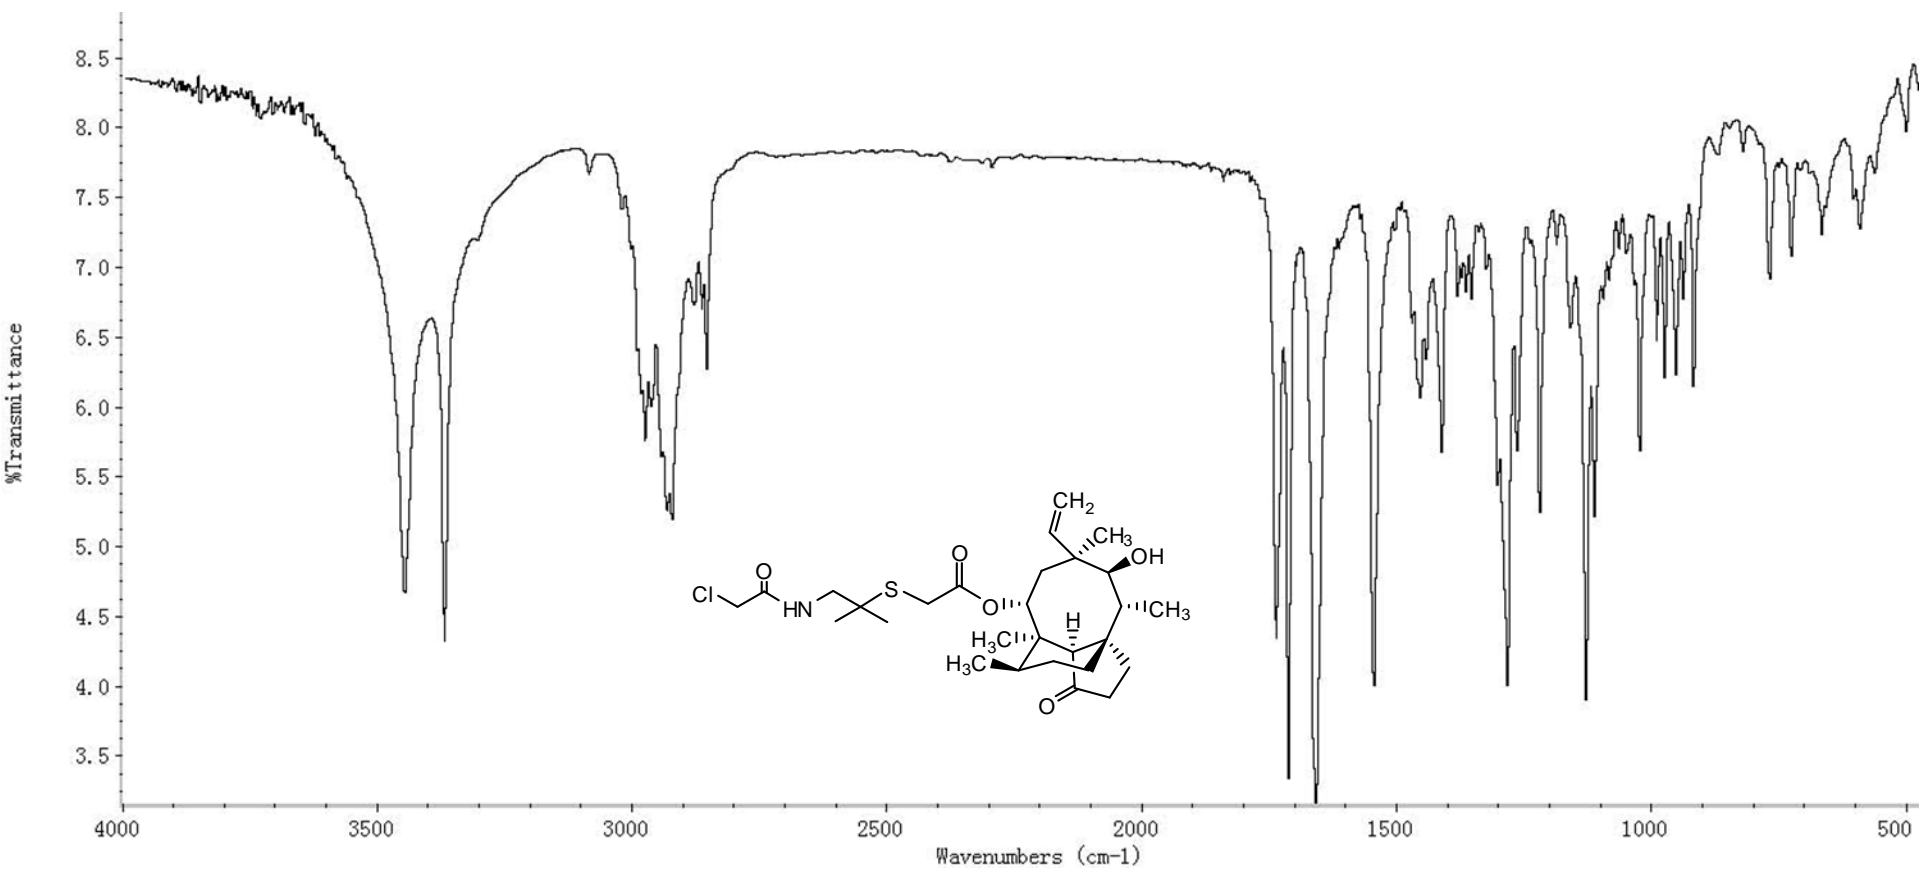

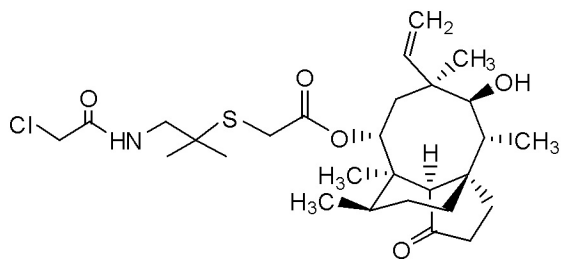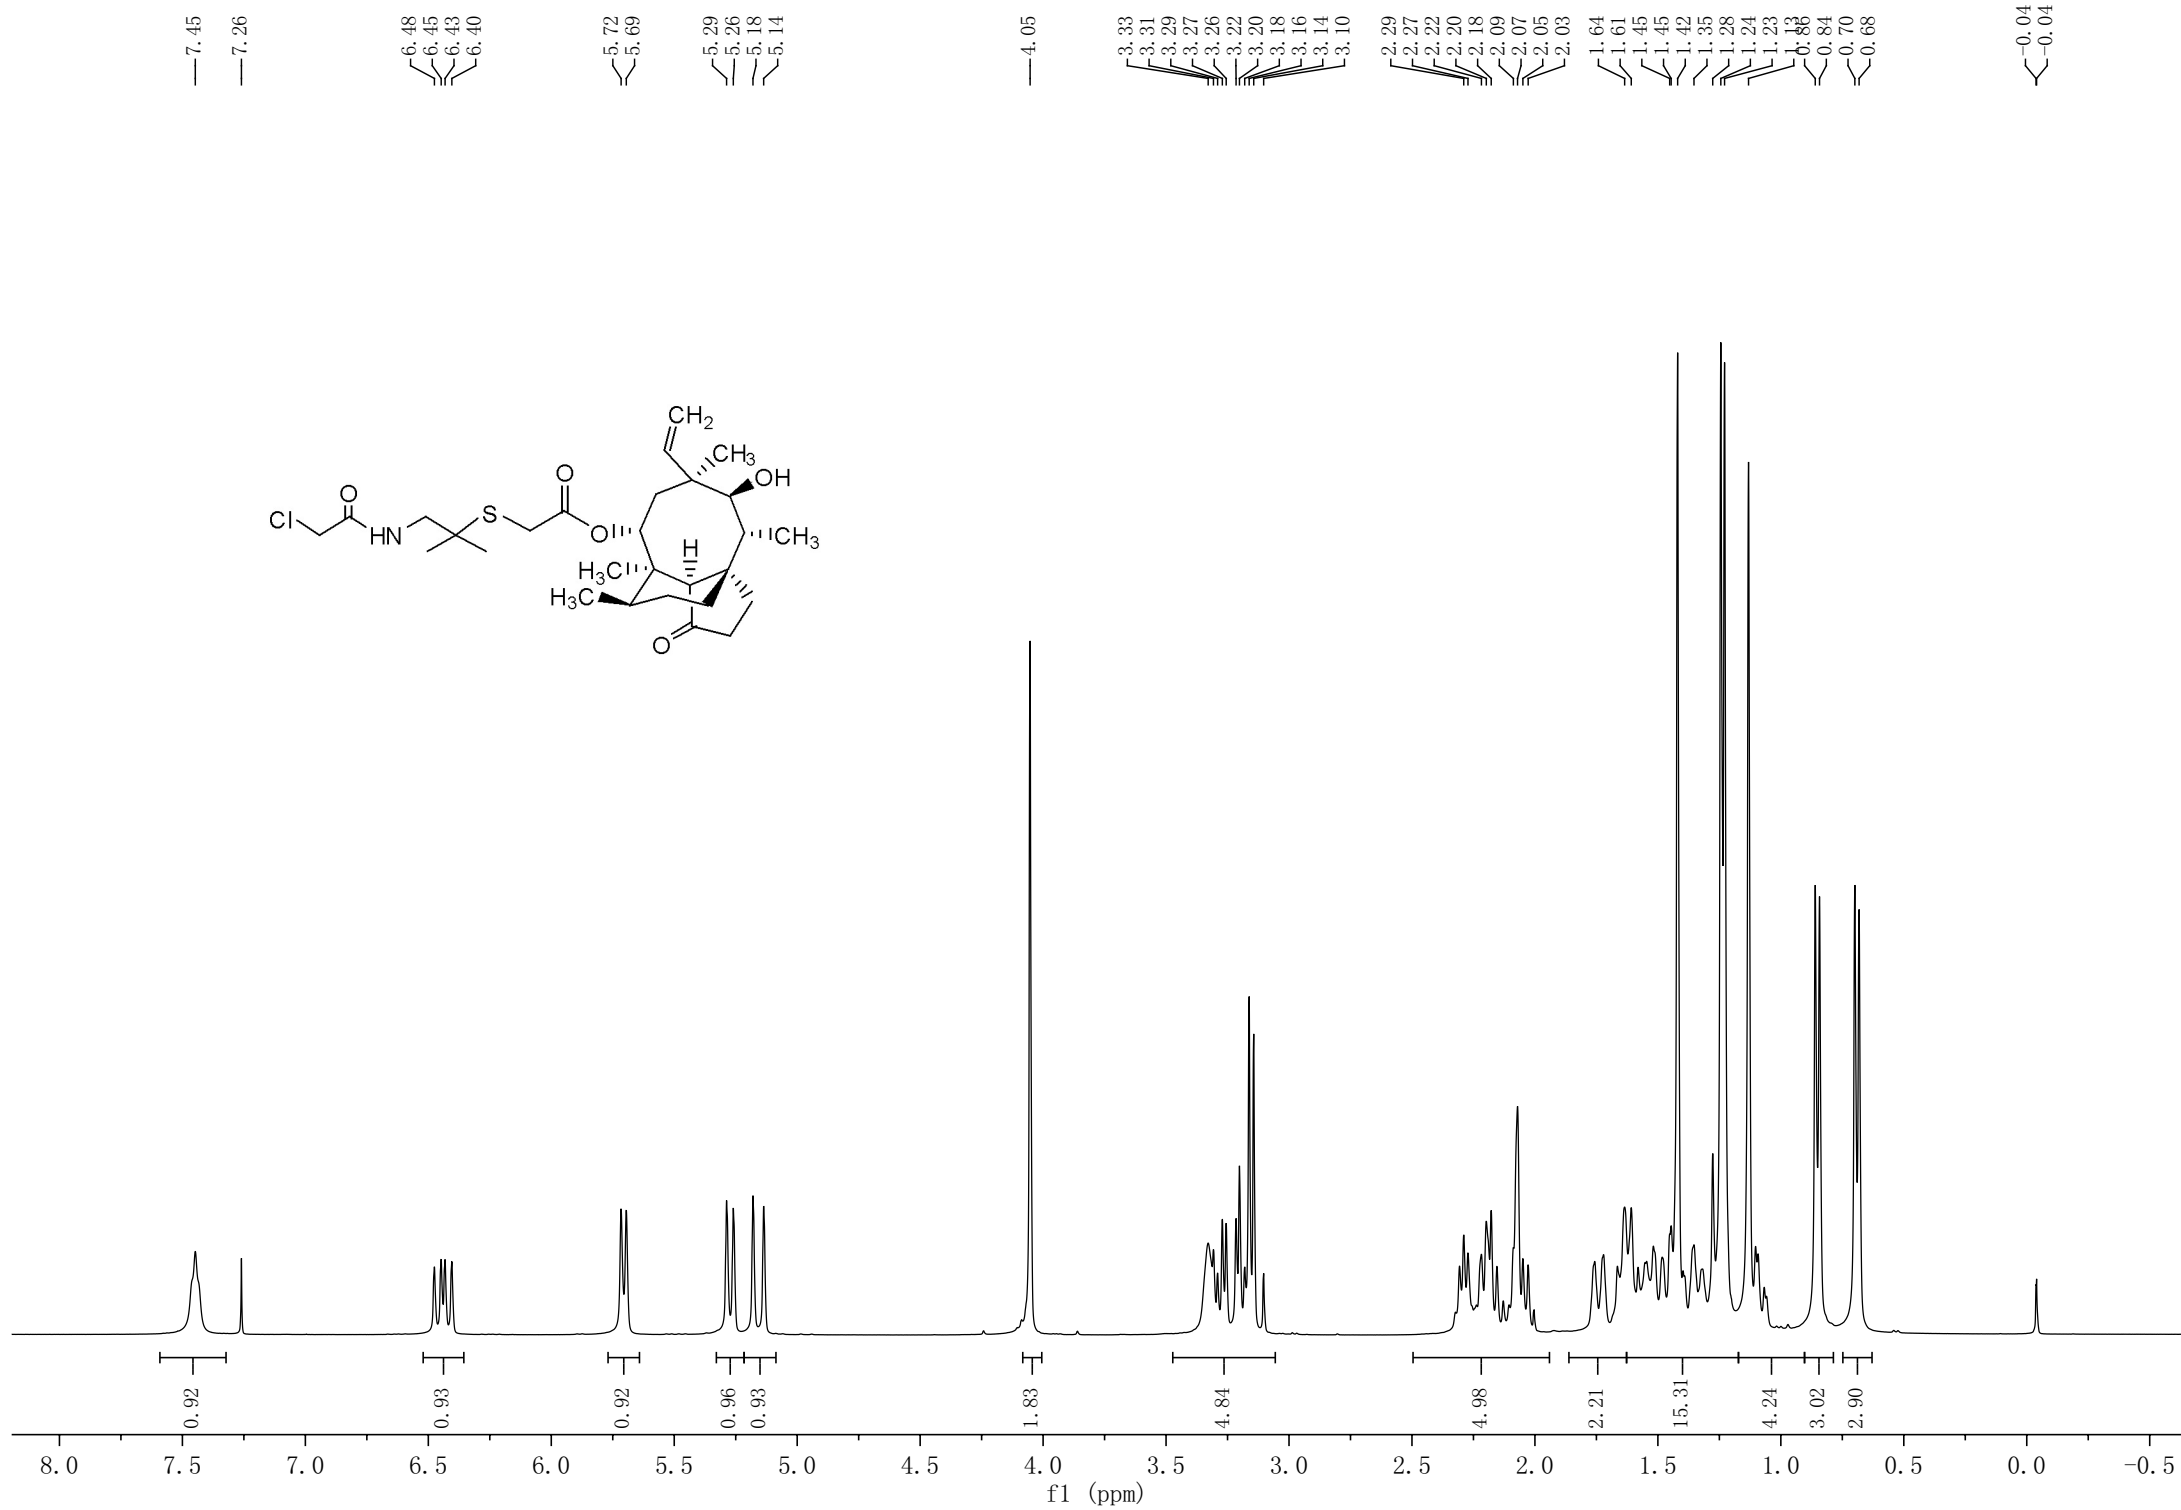



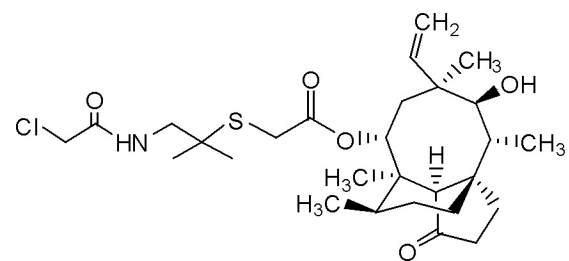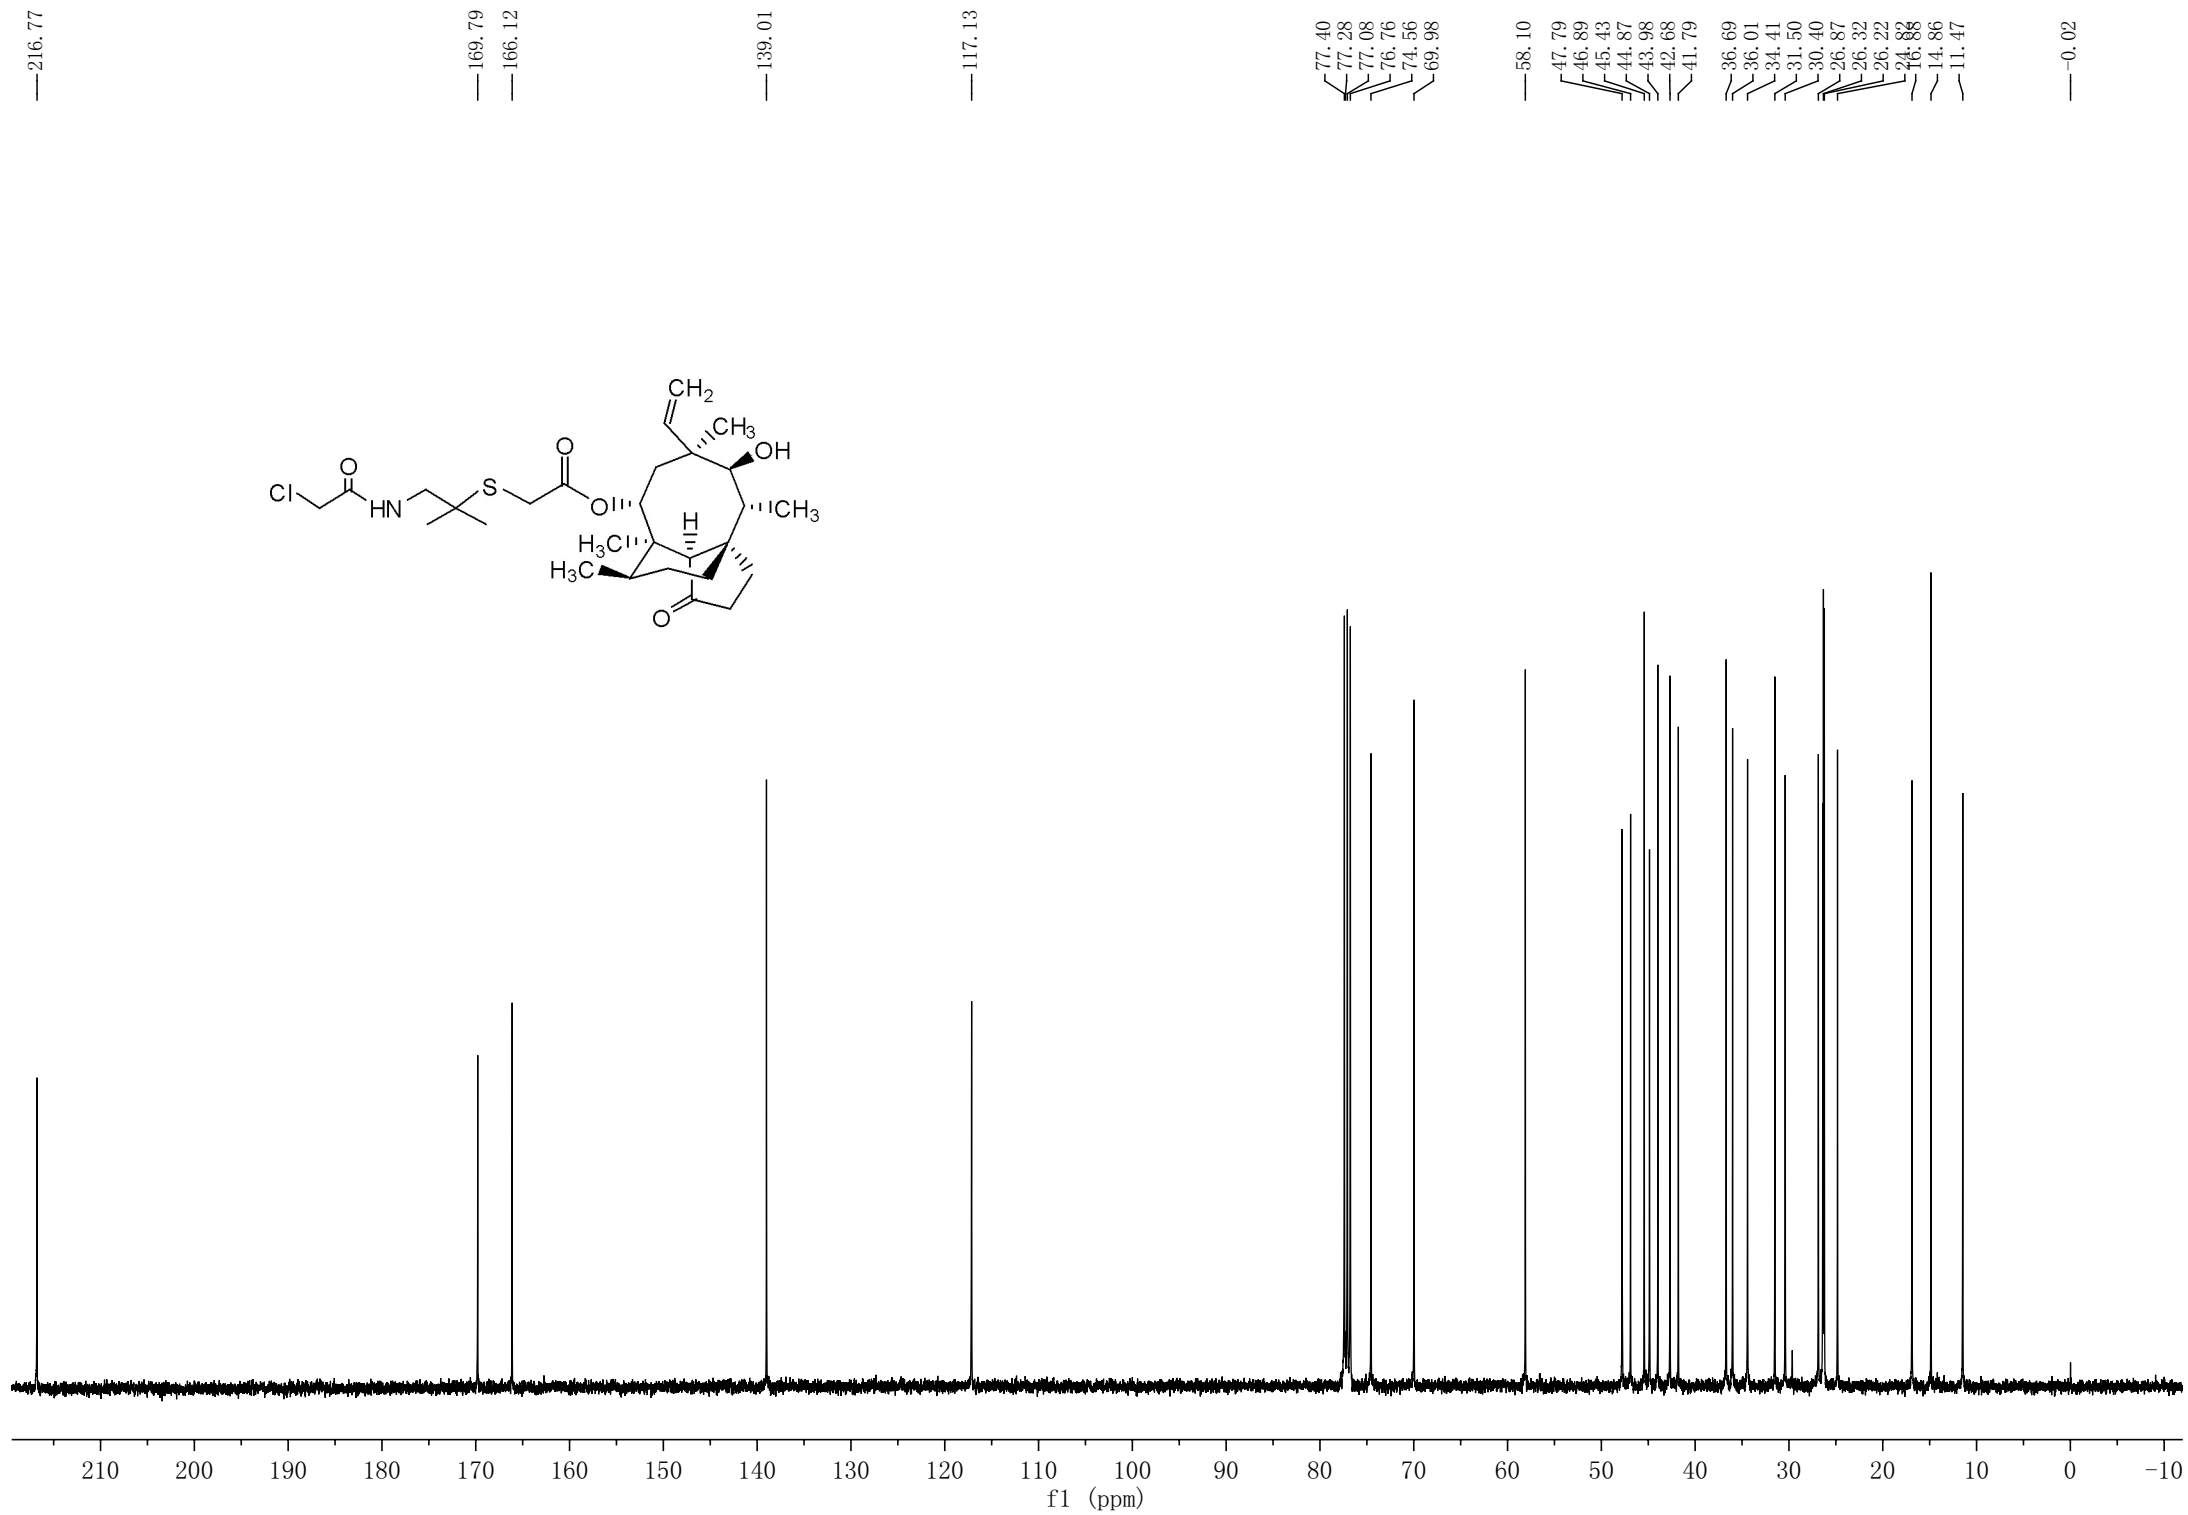

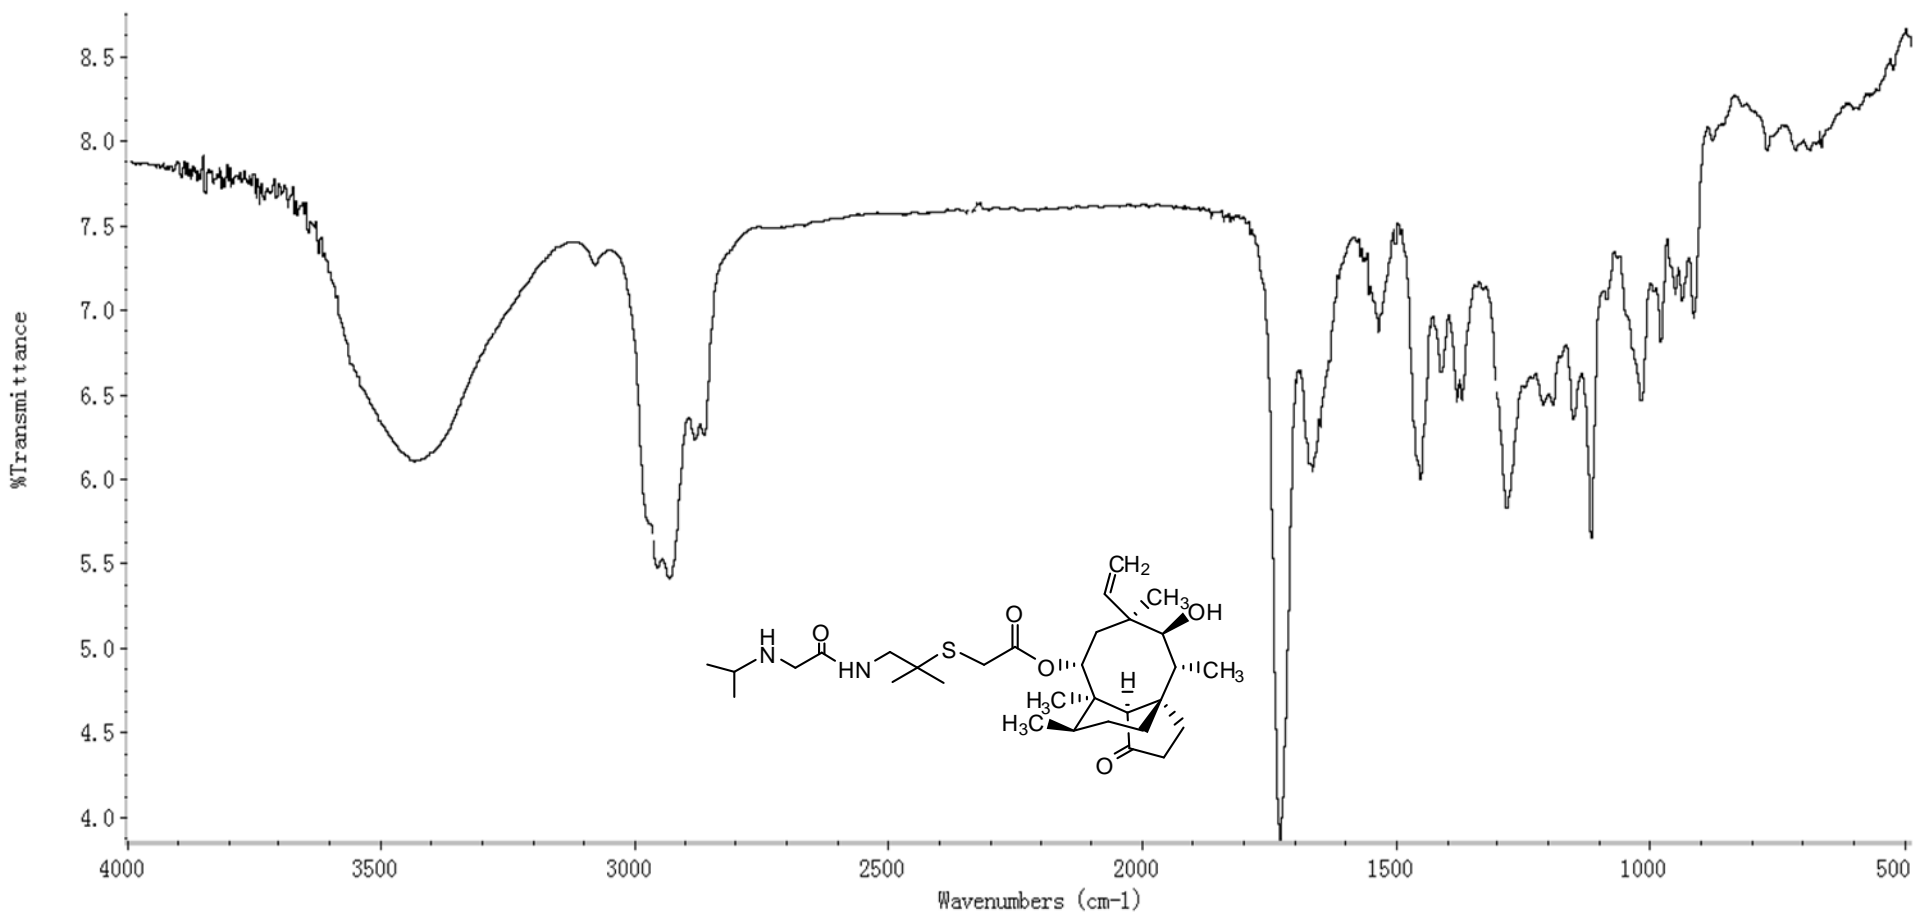

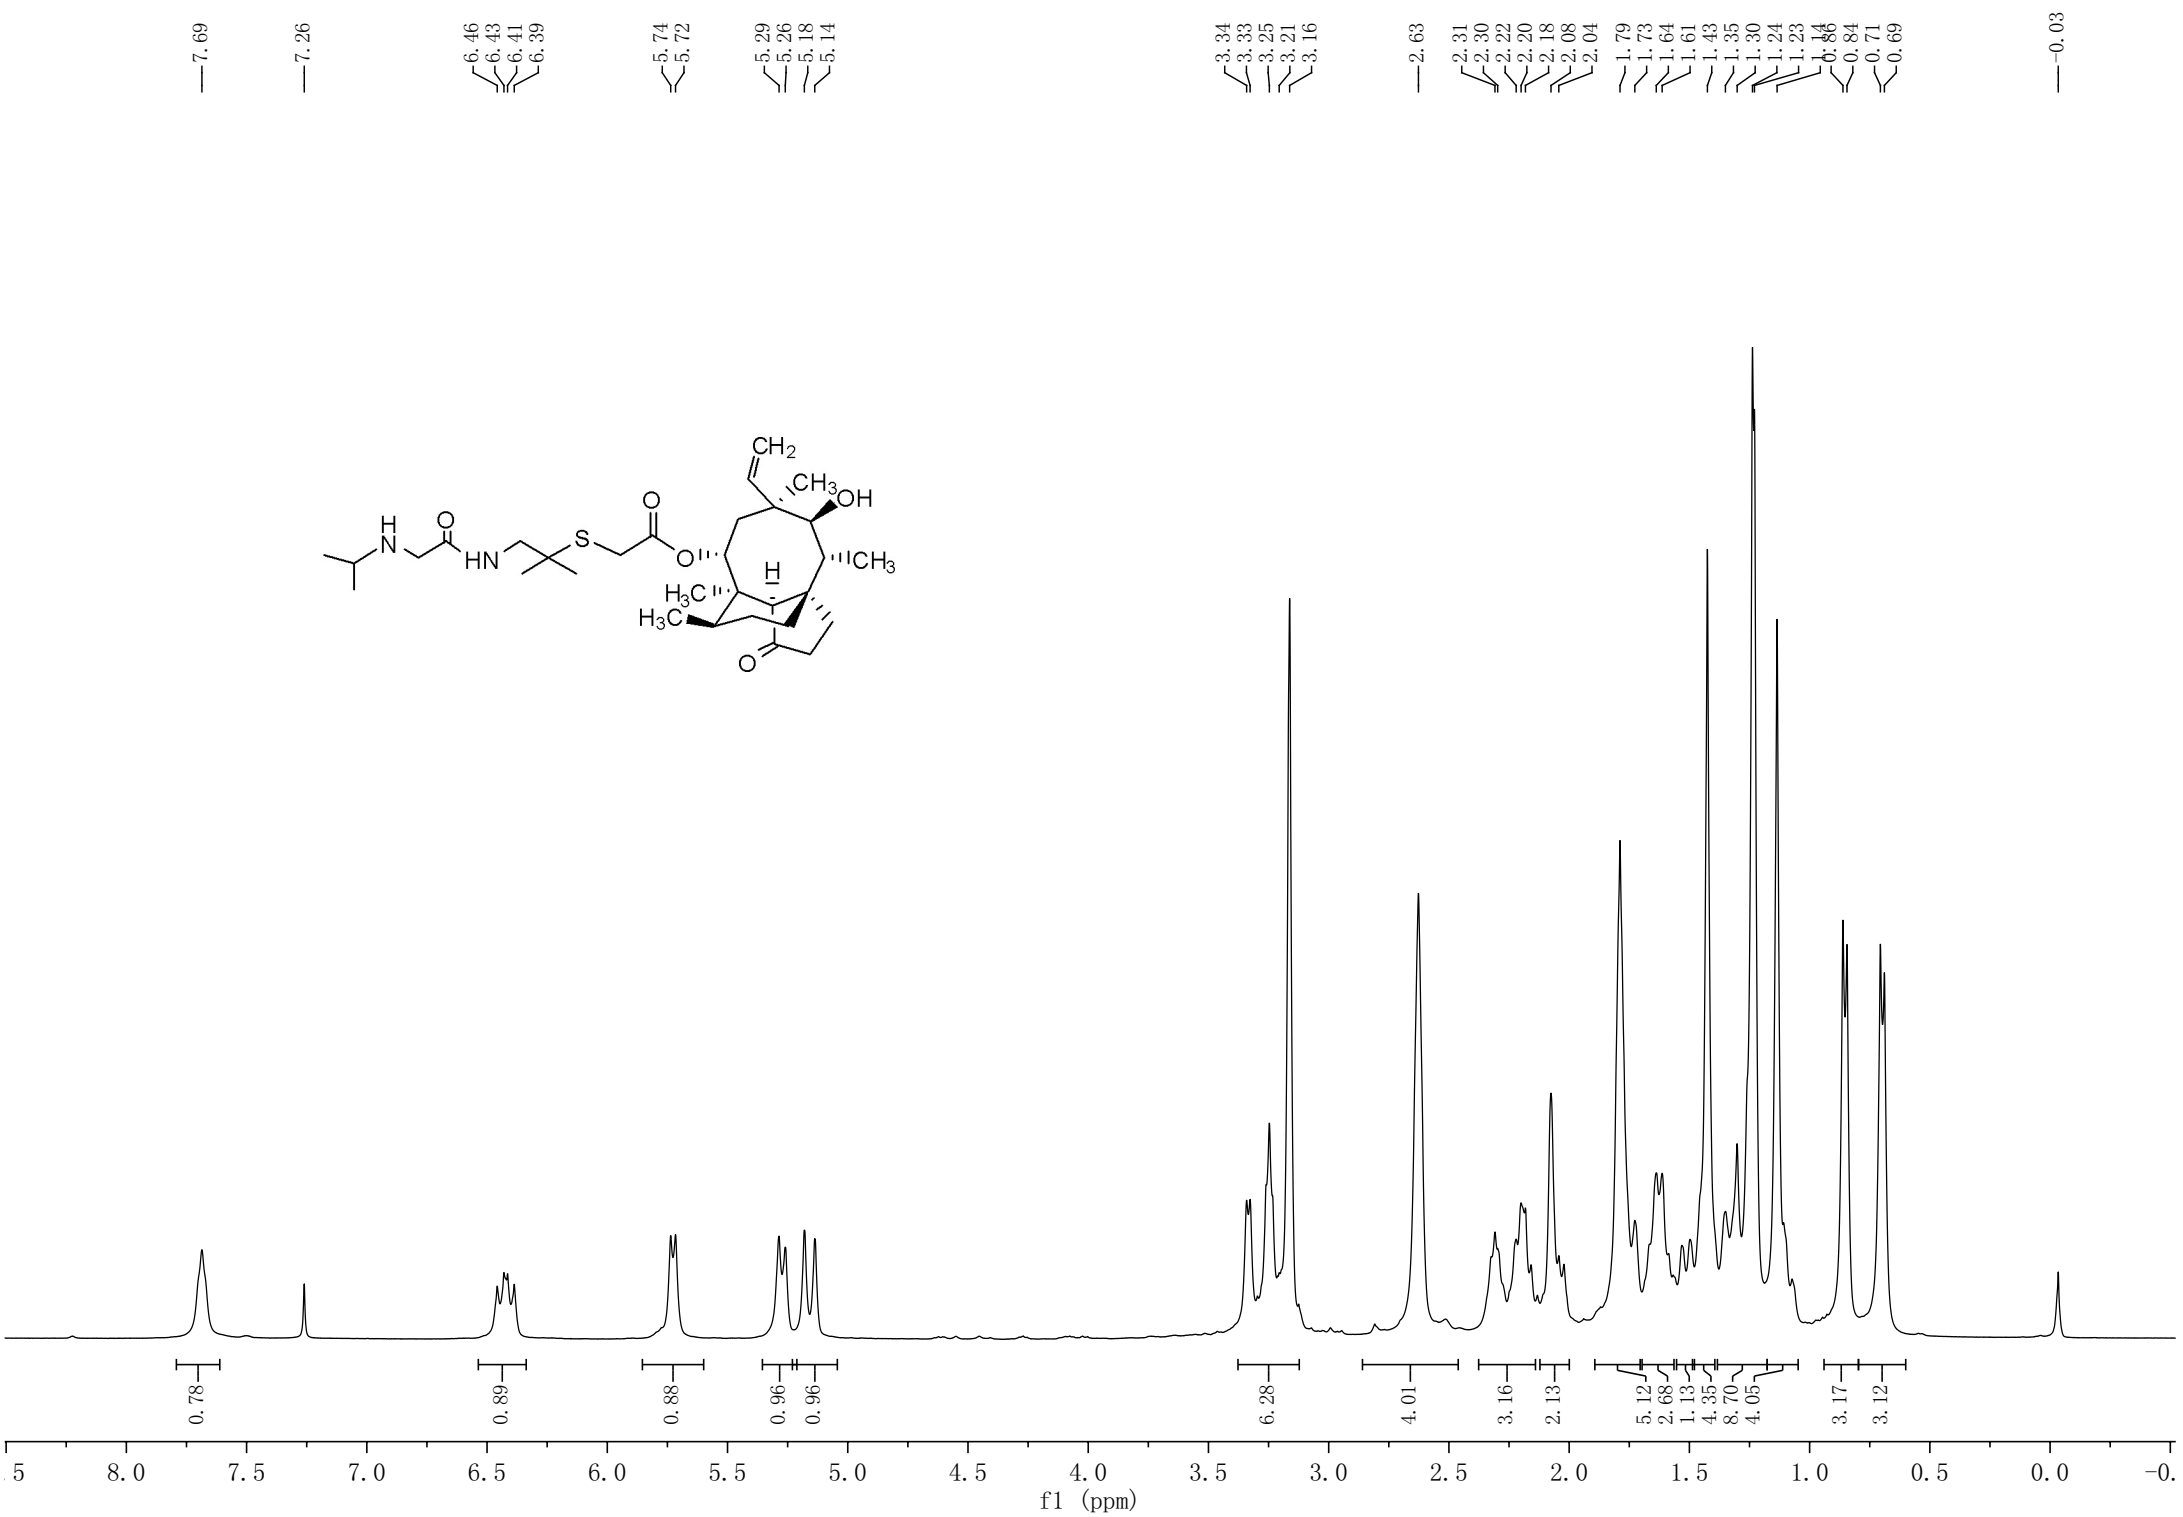

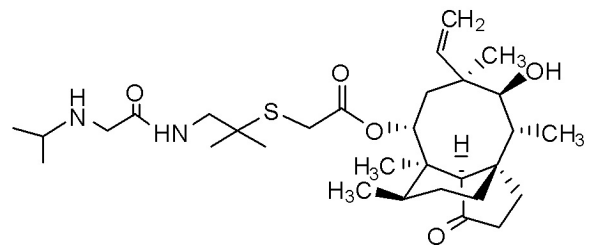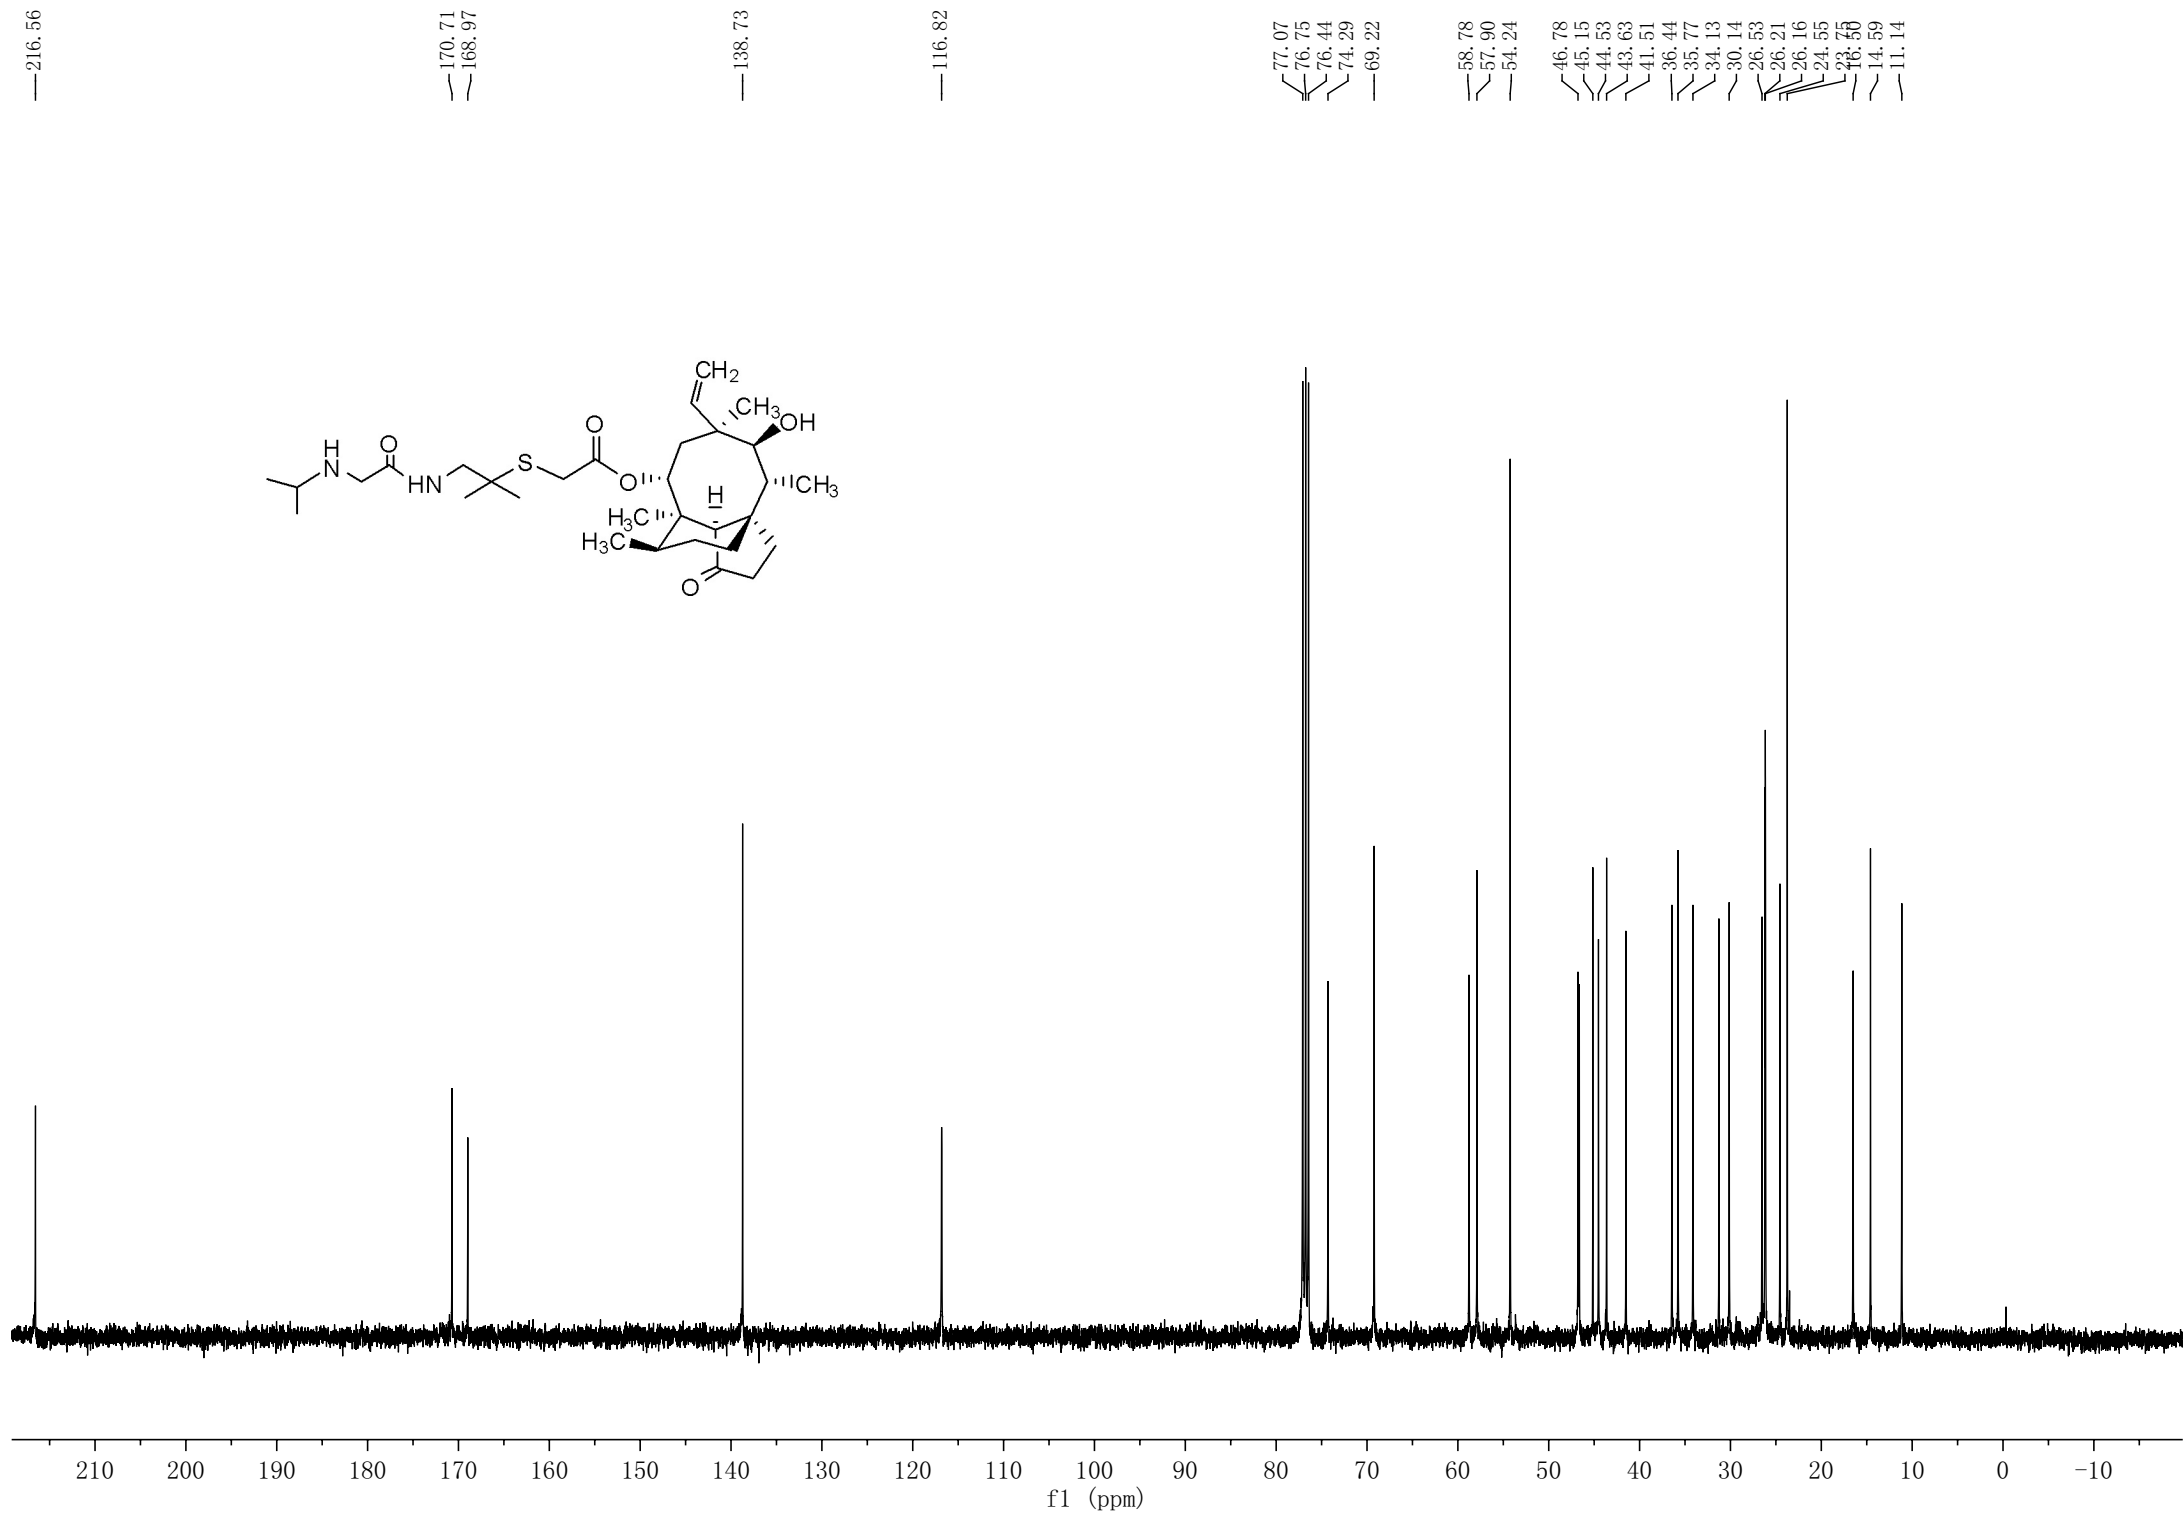

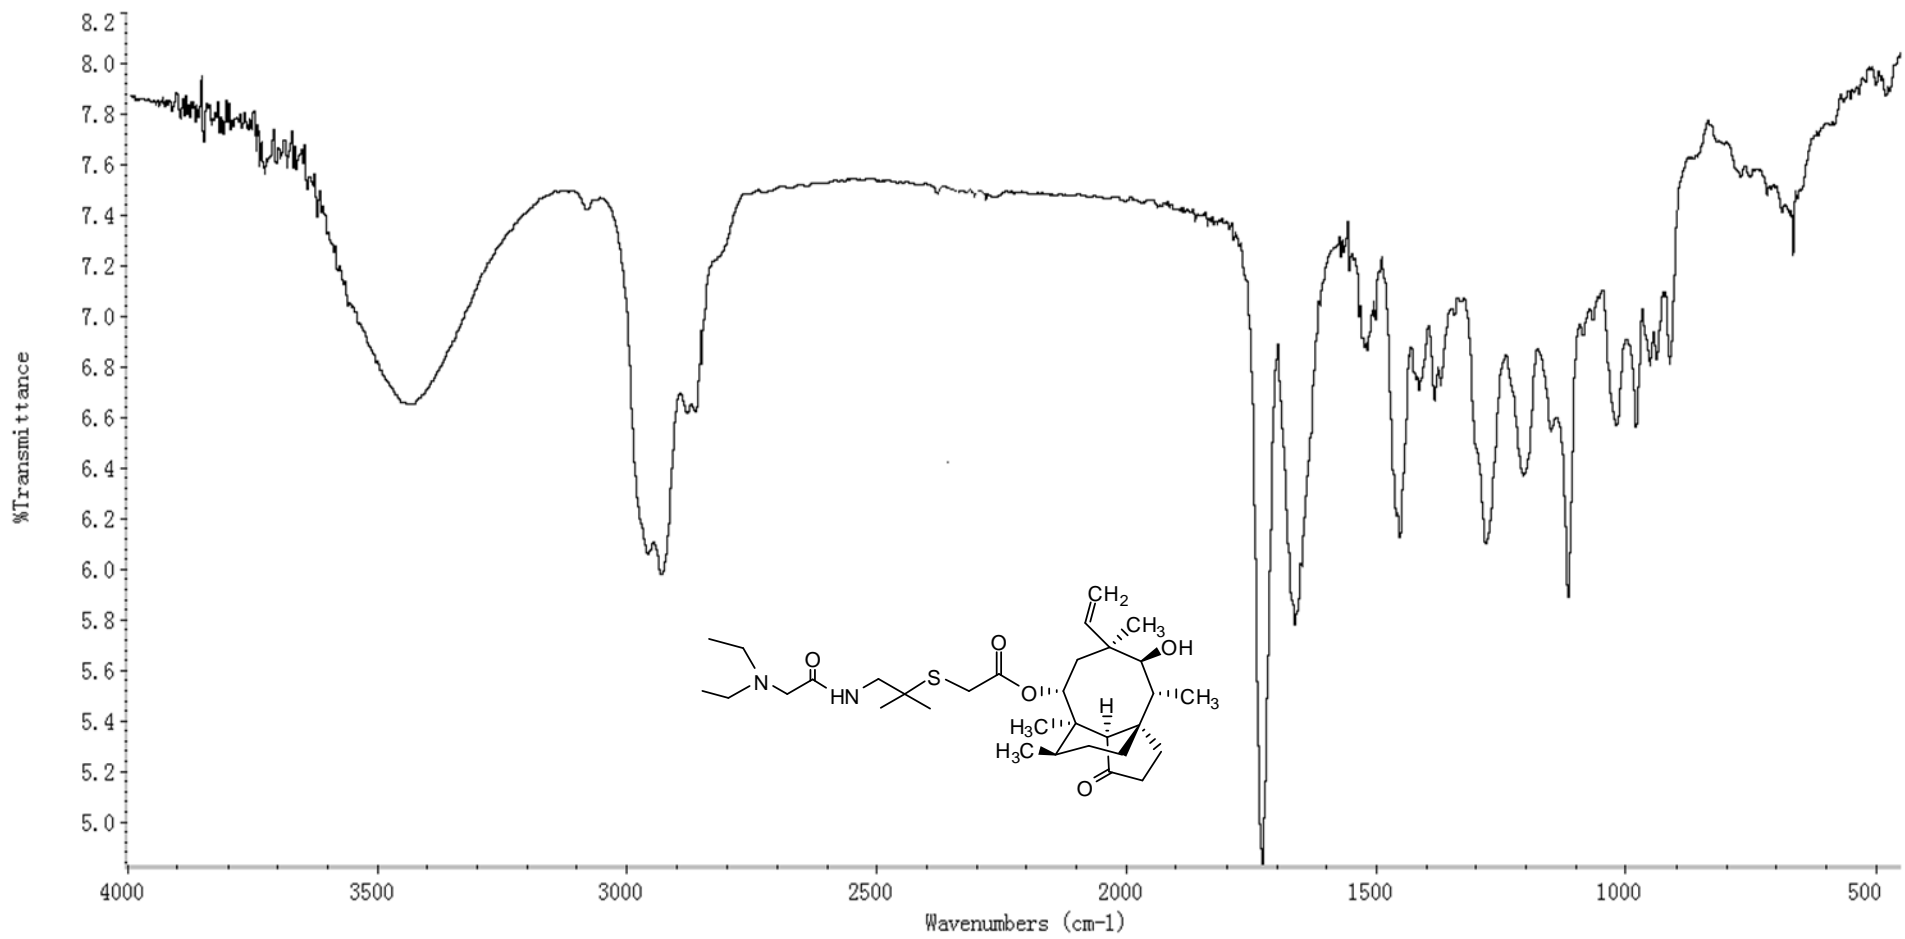



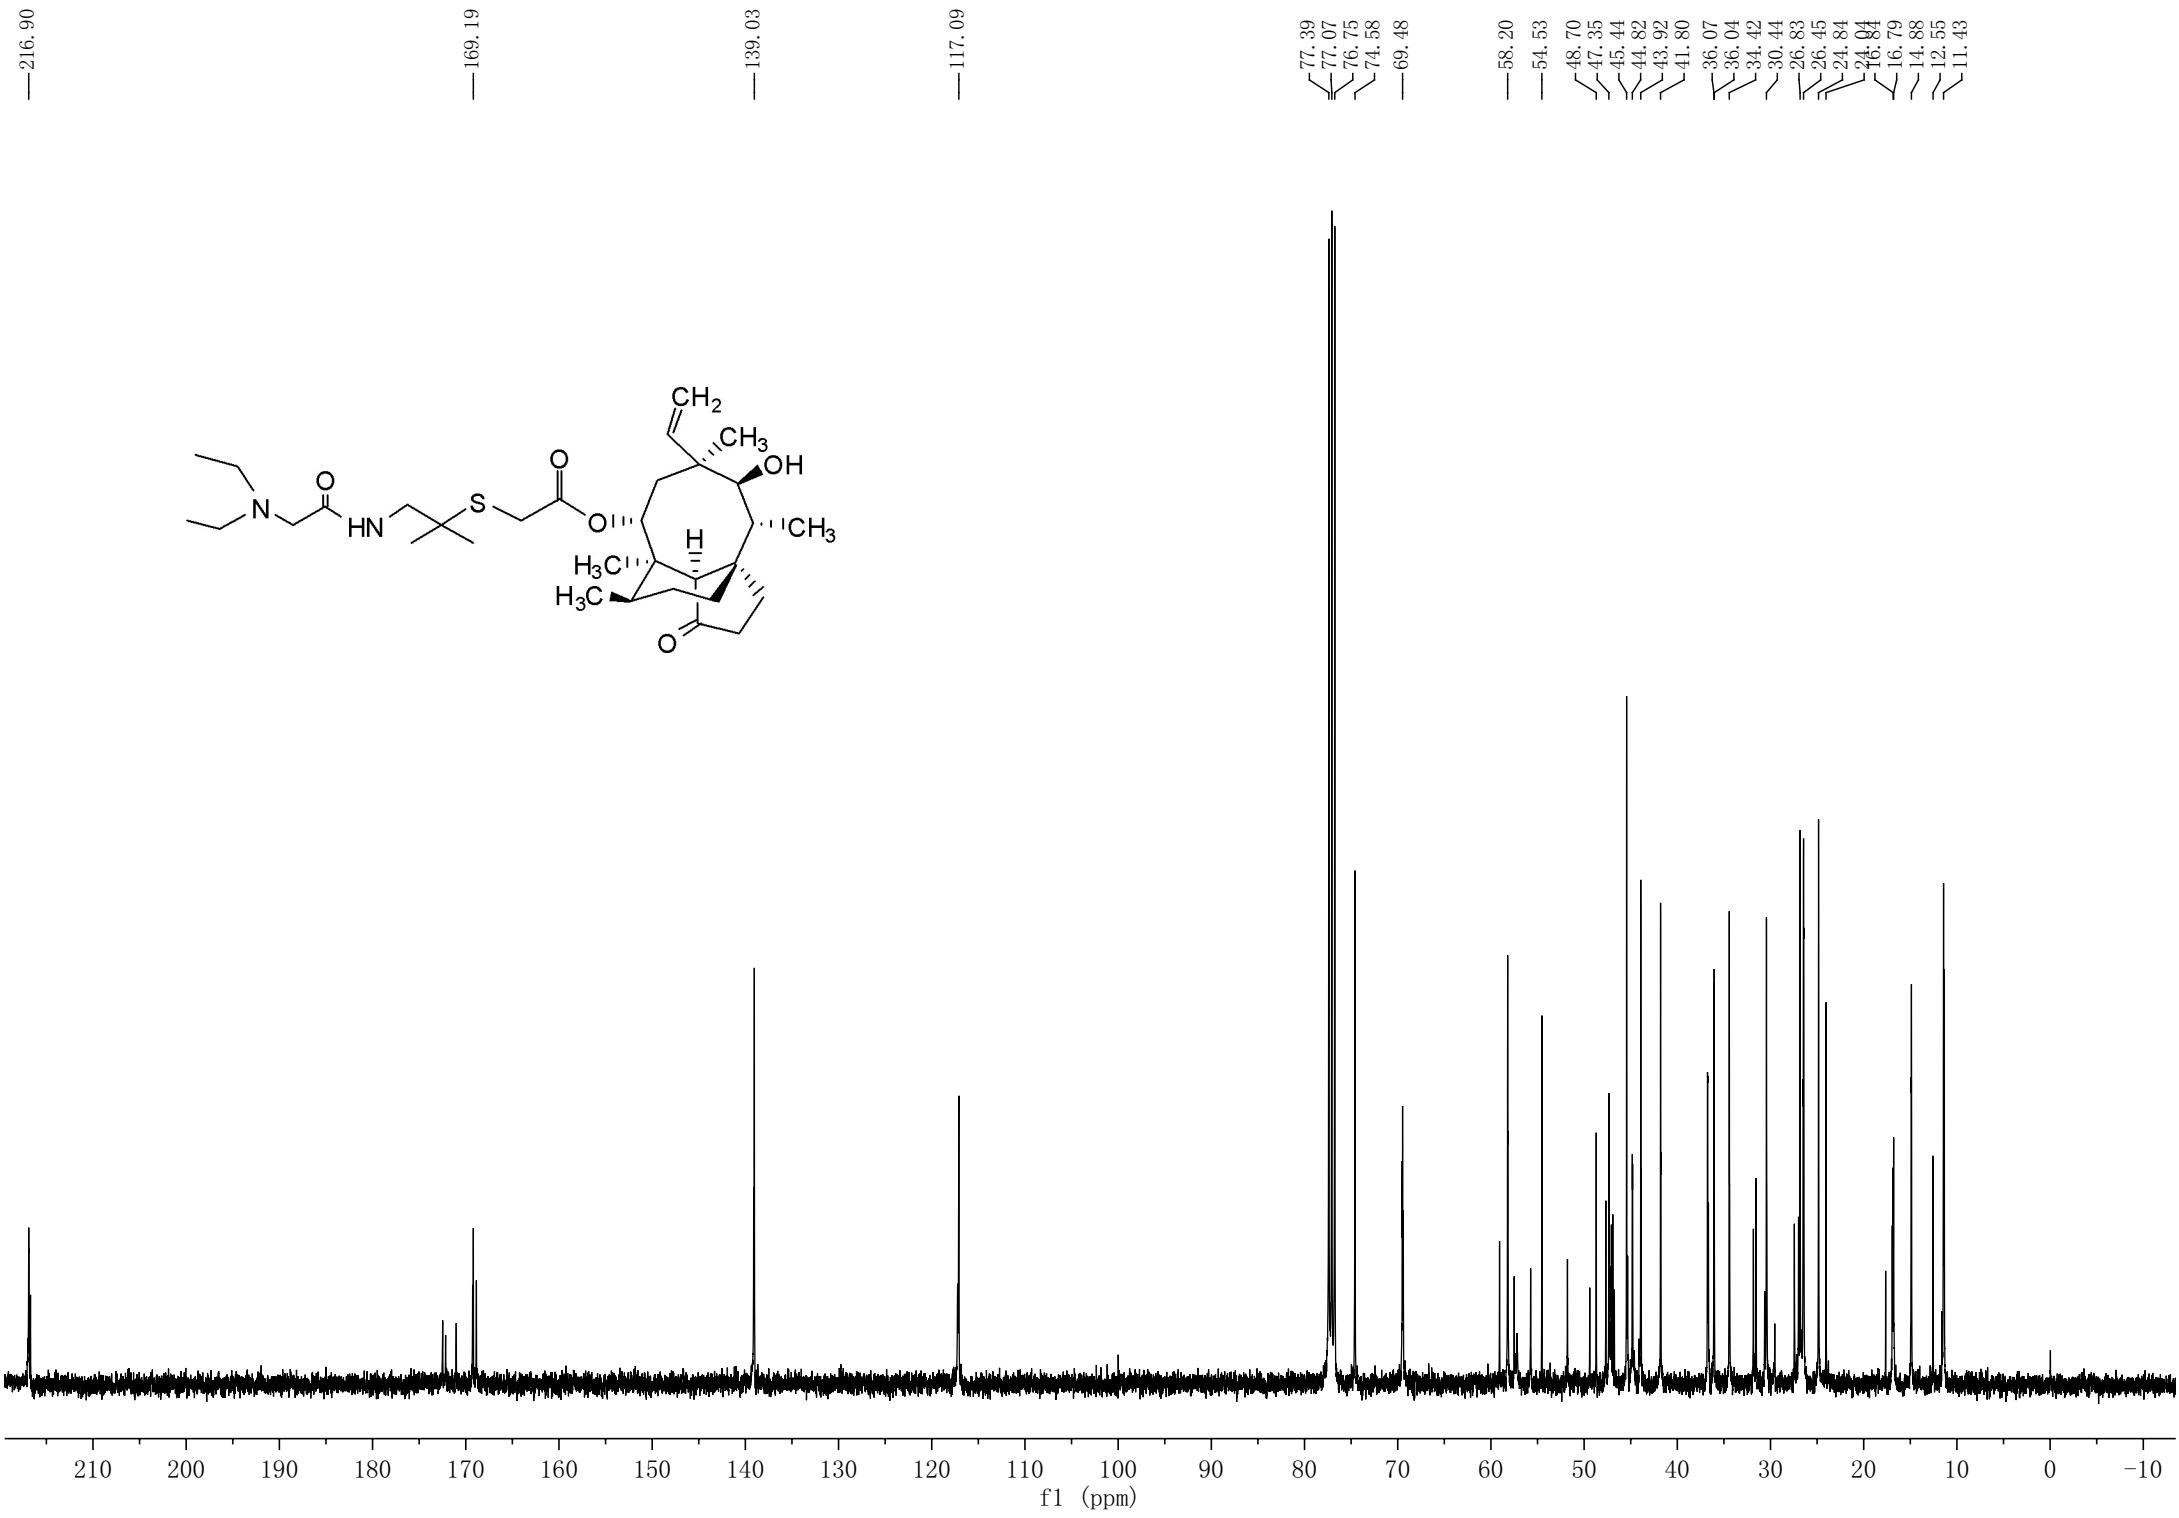

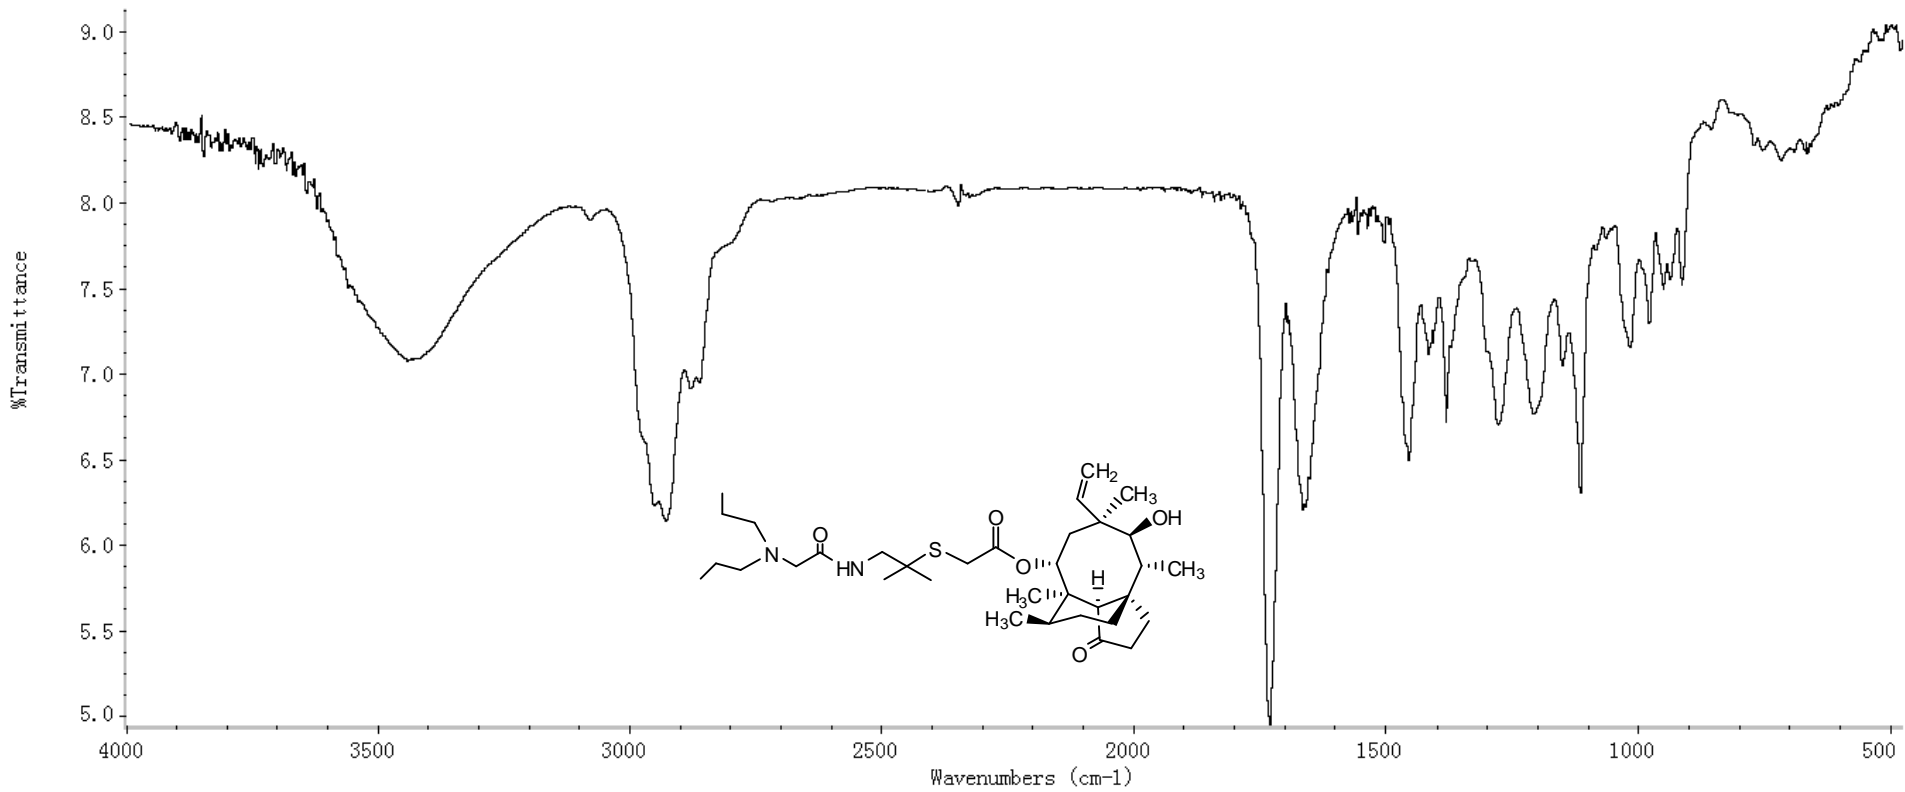



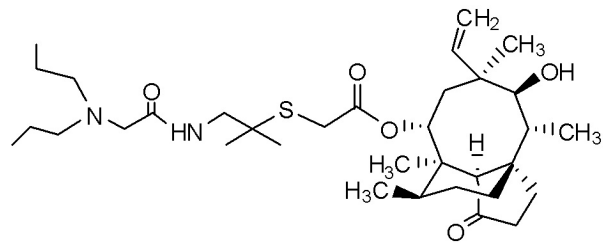

—7.26

6.45  
6.43  
6.42  
6.40  
6.38

5.79  
5.78  
5.71  
5.70

5.30  
5.29  
5.28  
5.18  
5.14

4.57  
4.53  
4.44  
4.39

3.56  
3.52  
3.47  
3.37  
3.34  
3.29  
3.25  
3.16  
3.15

2.81  
2.80  
2.68  
2.54

2.33  
2.32  
2.31  
2.28  
2.22  
2.20  
2.16  
2.07  
1.74  
1.64  
1.61  
1.49  
1.41  
1.34  
1.30  
1.23  
1.14  
0.85  
0.70  
0.70

-0.03  
-0.04

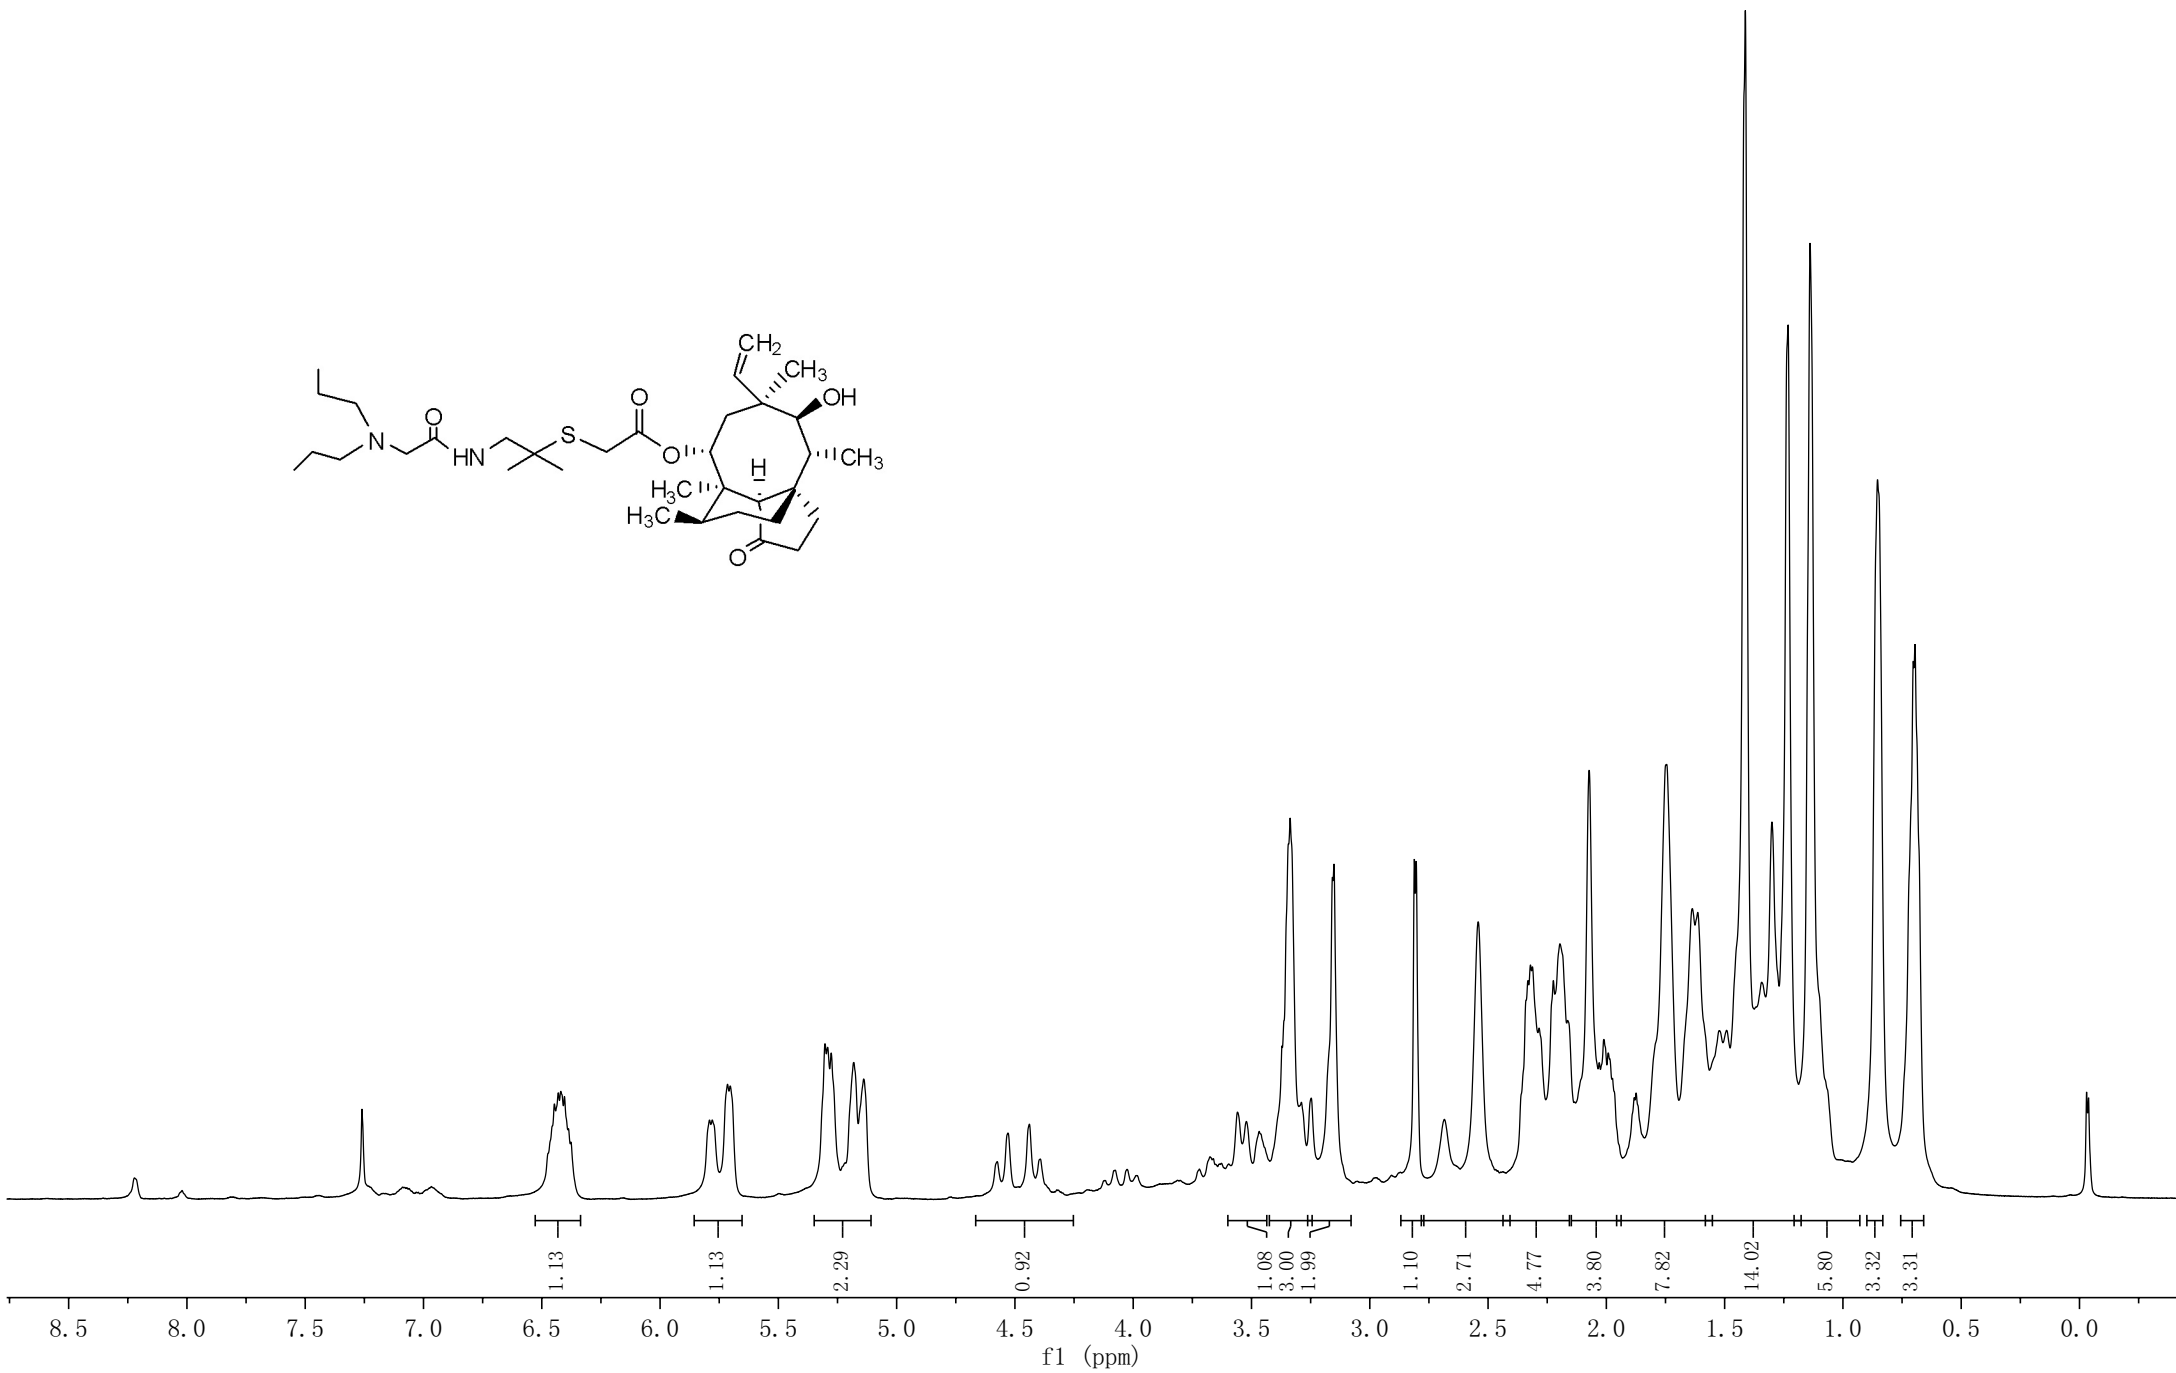

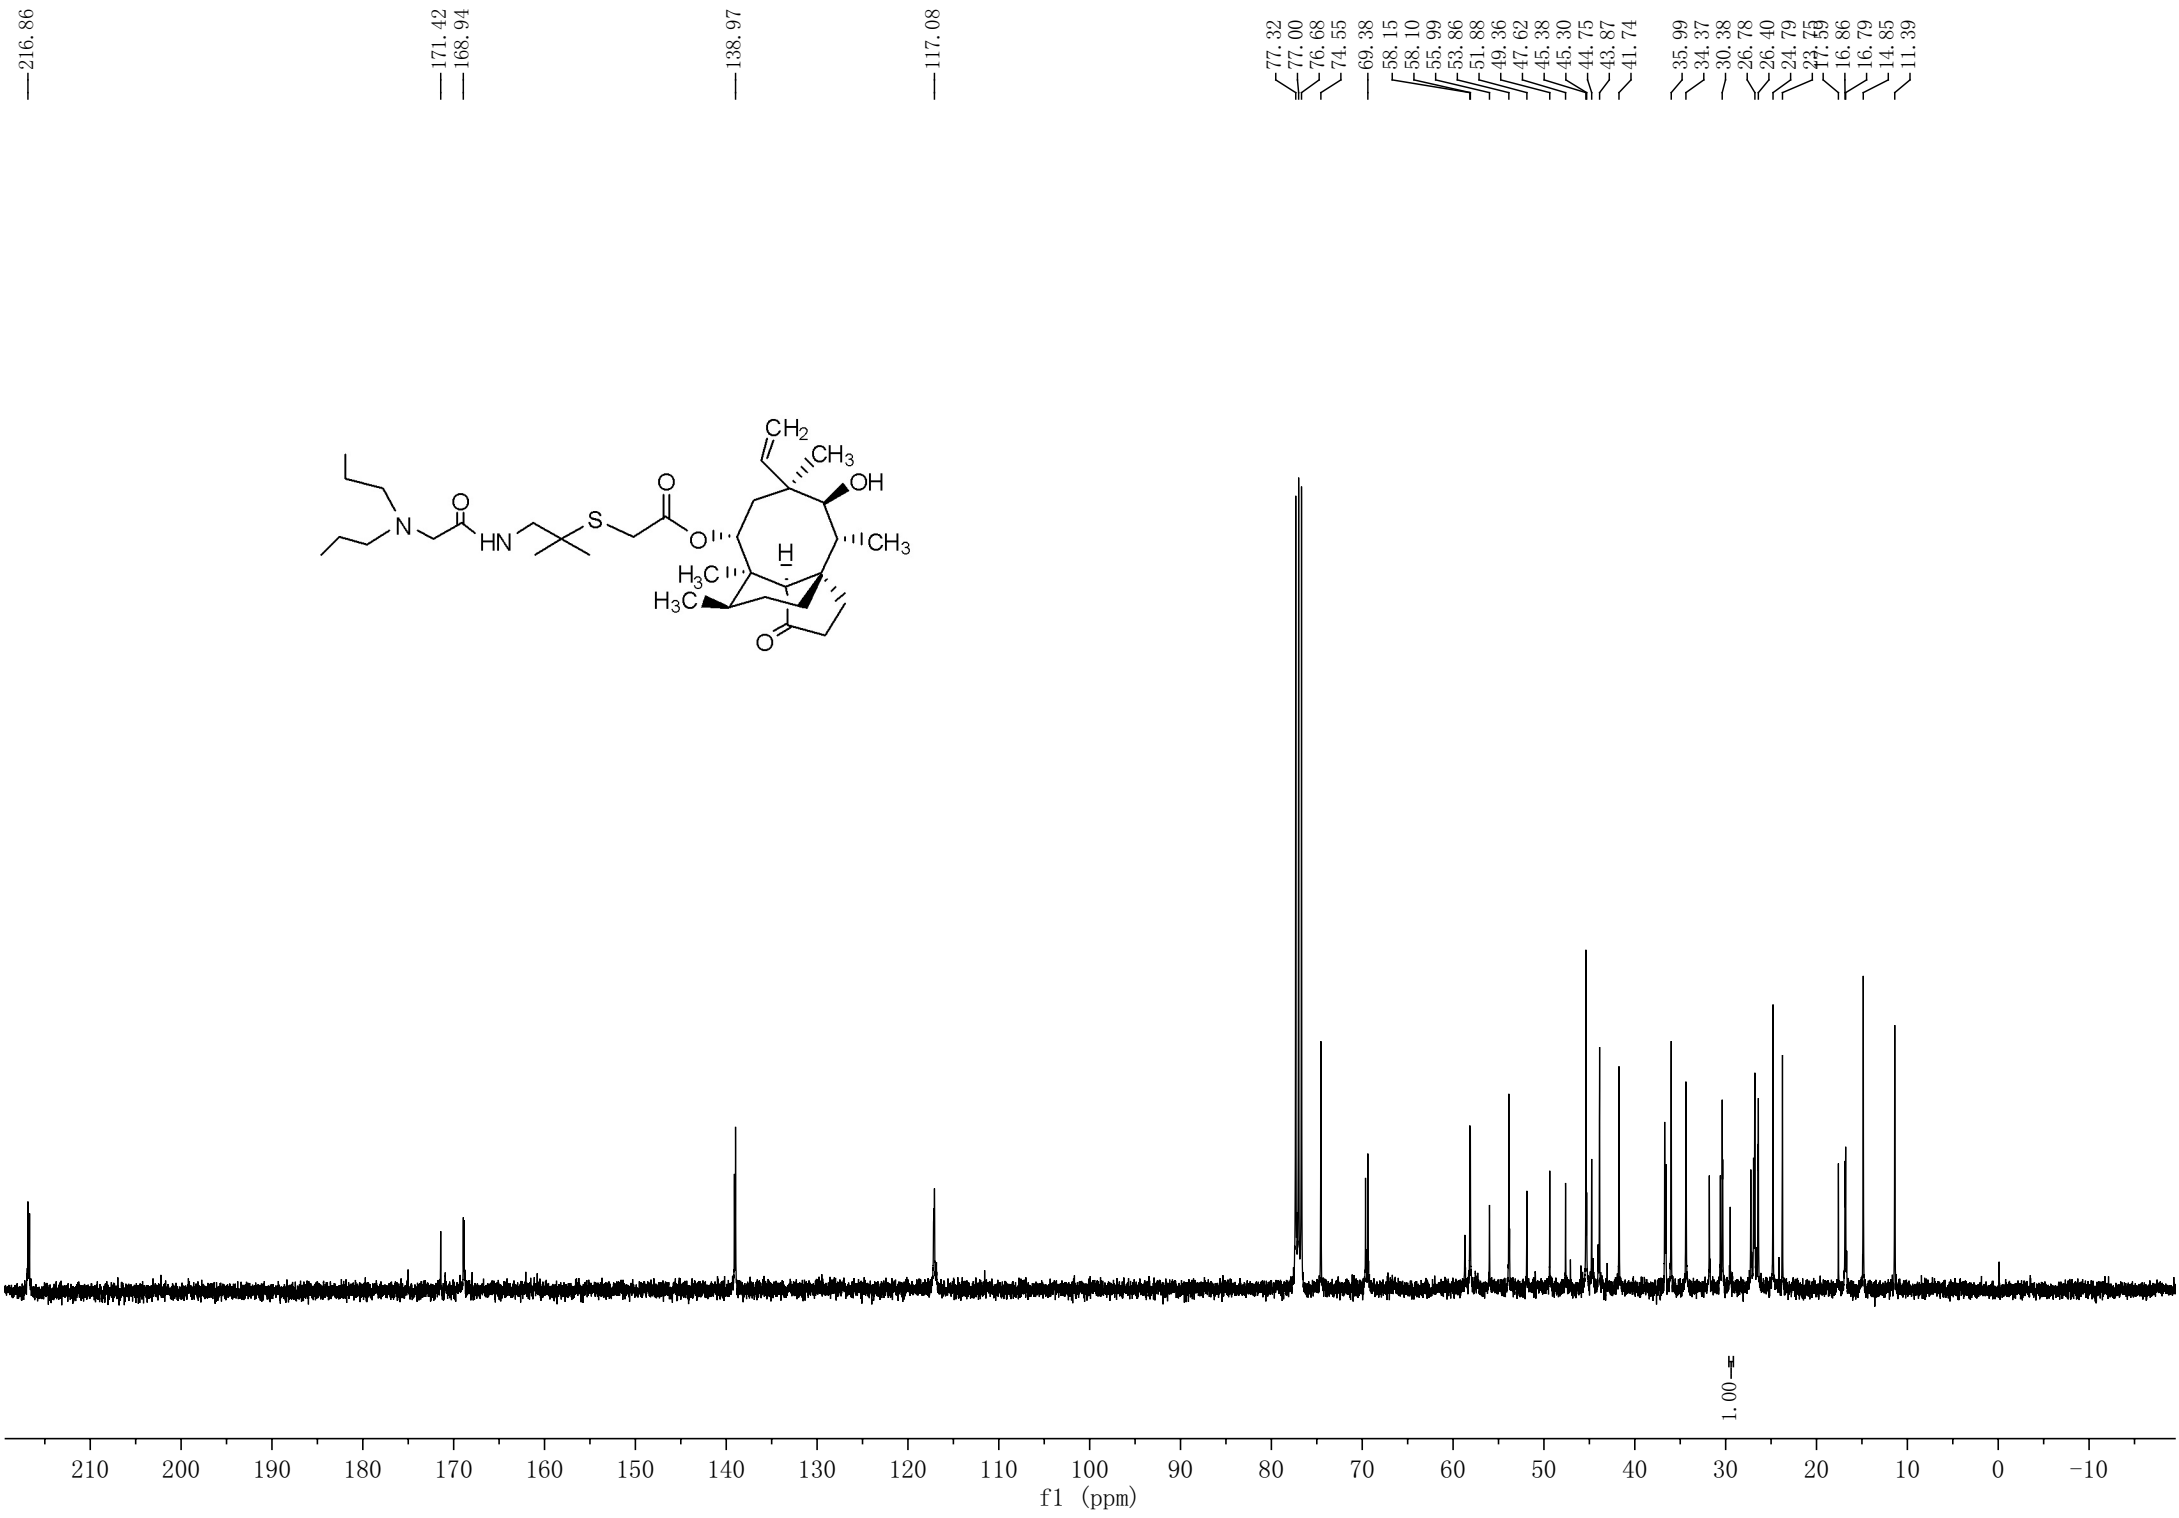



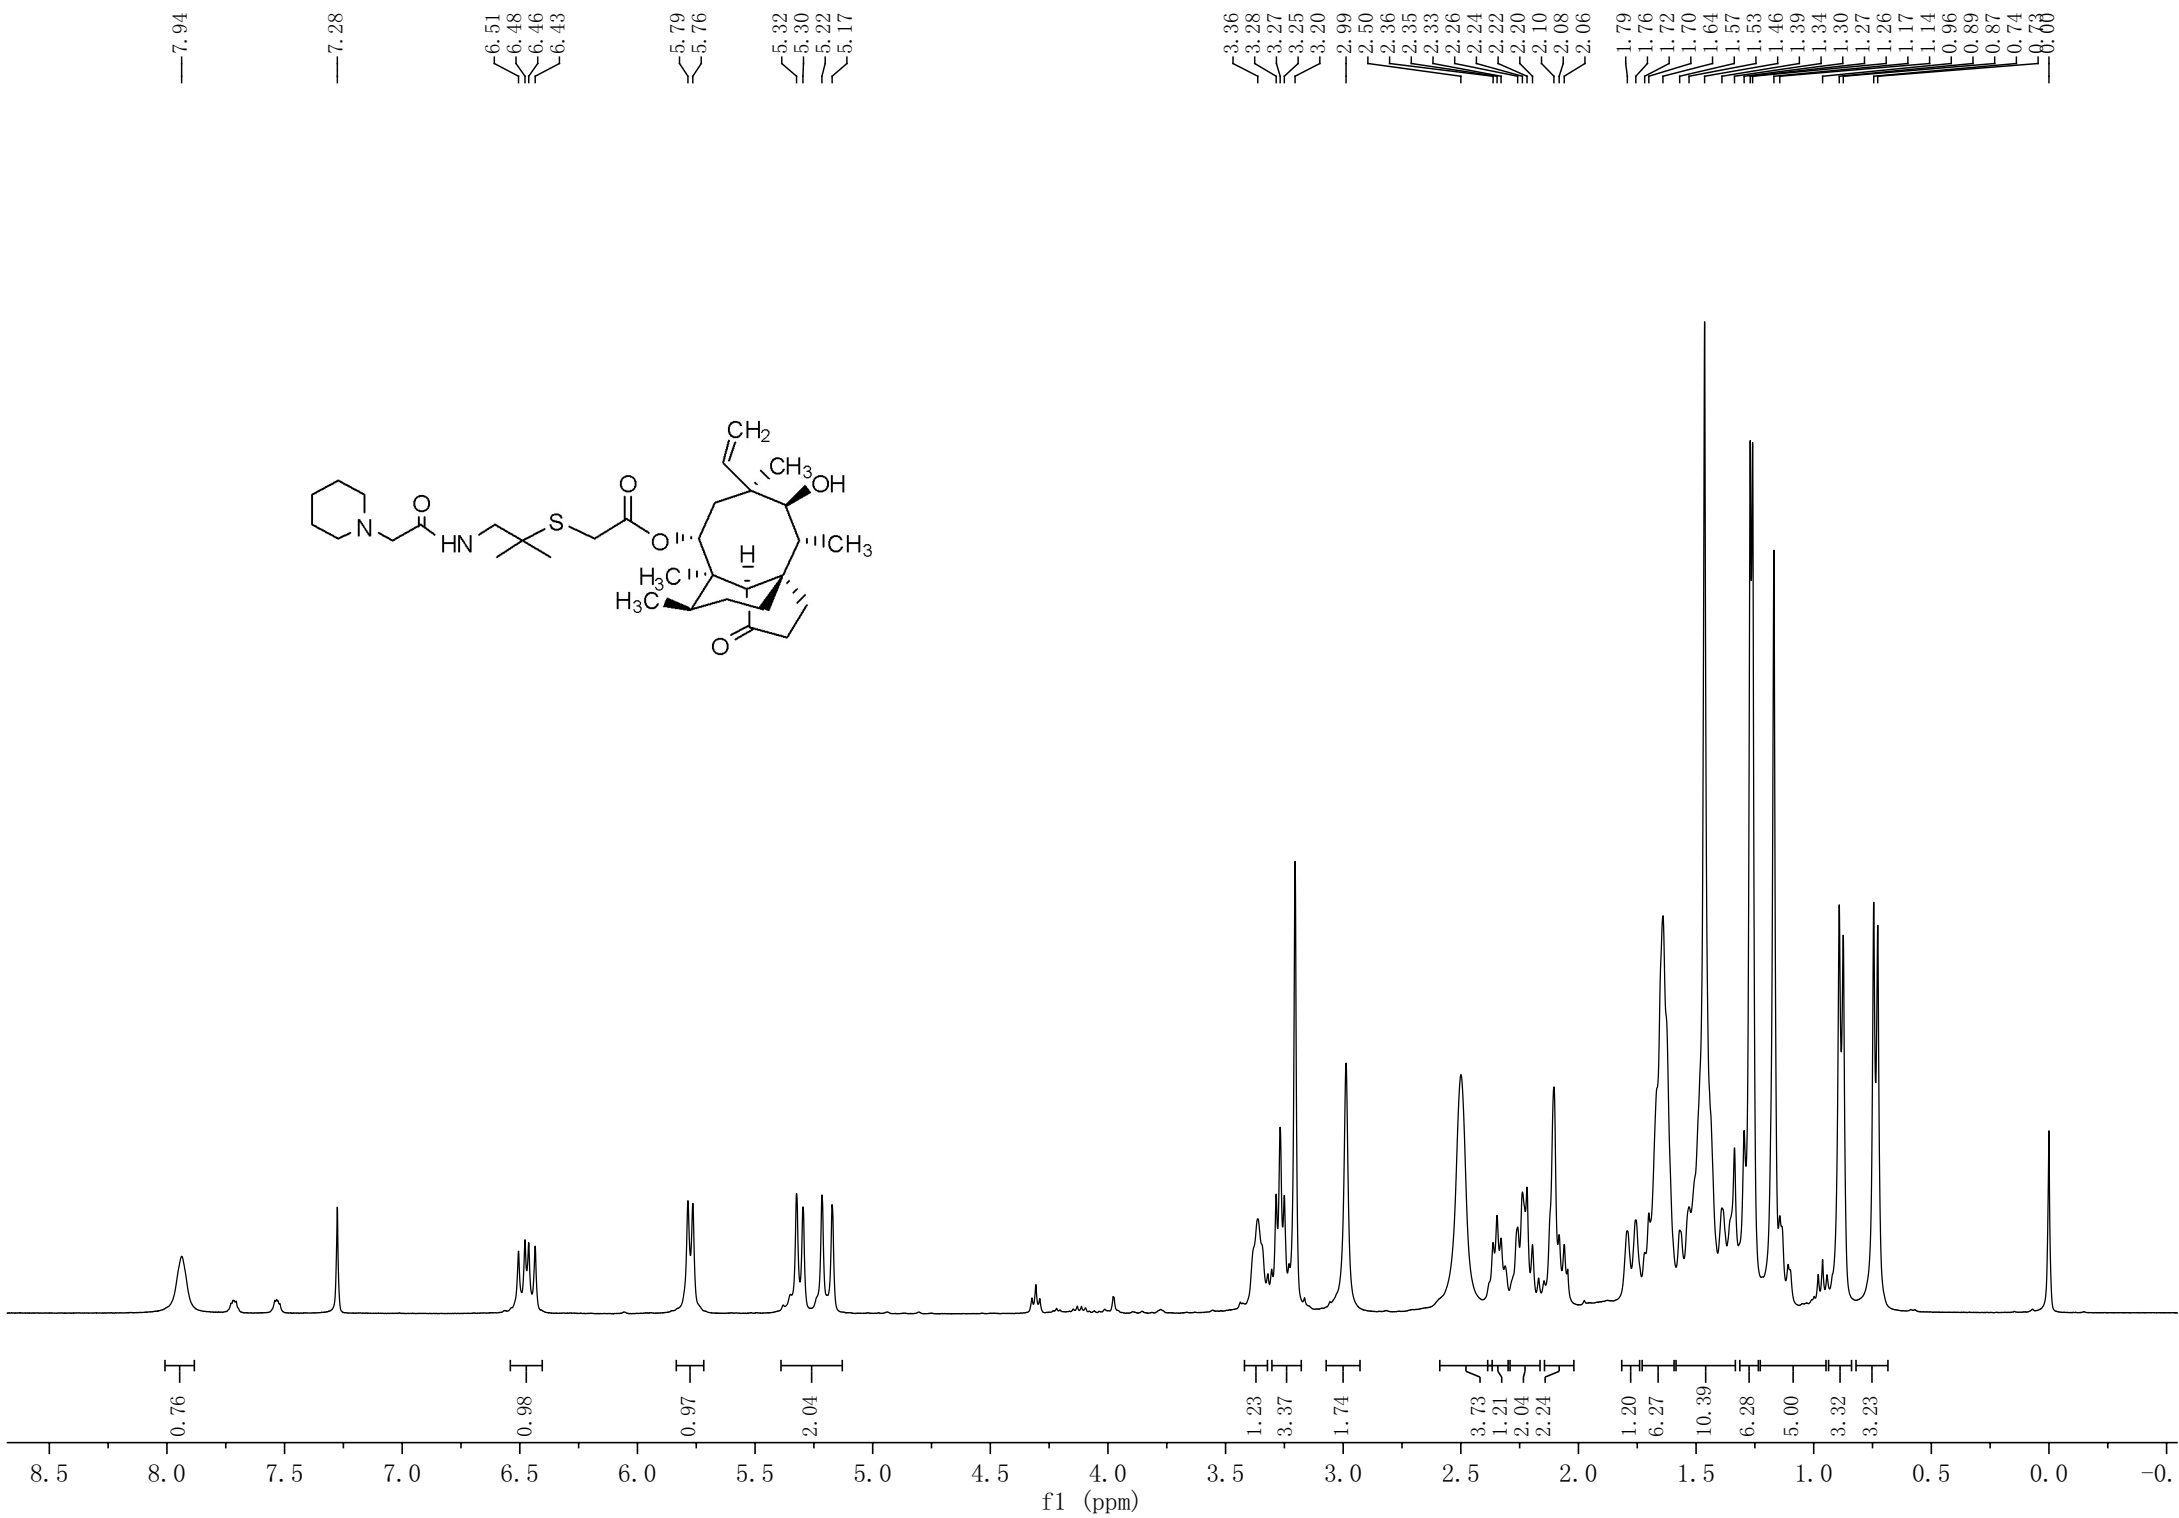

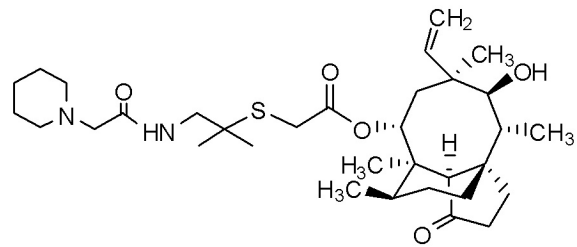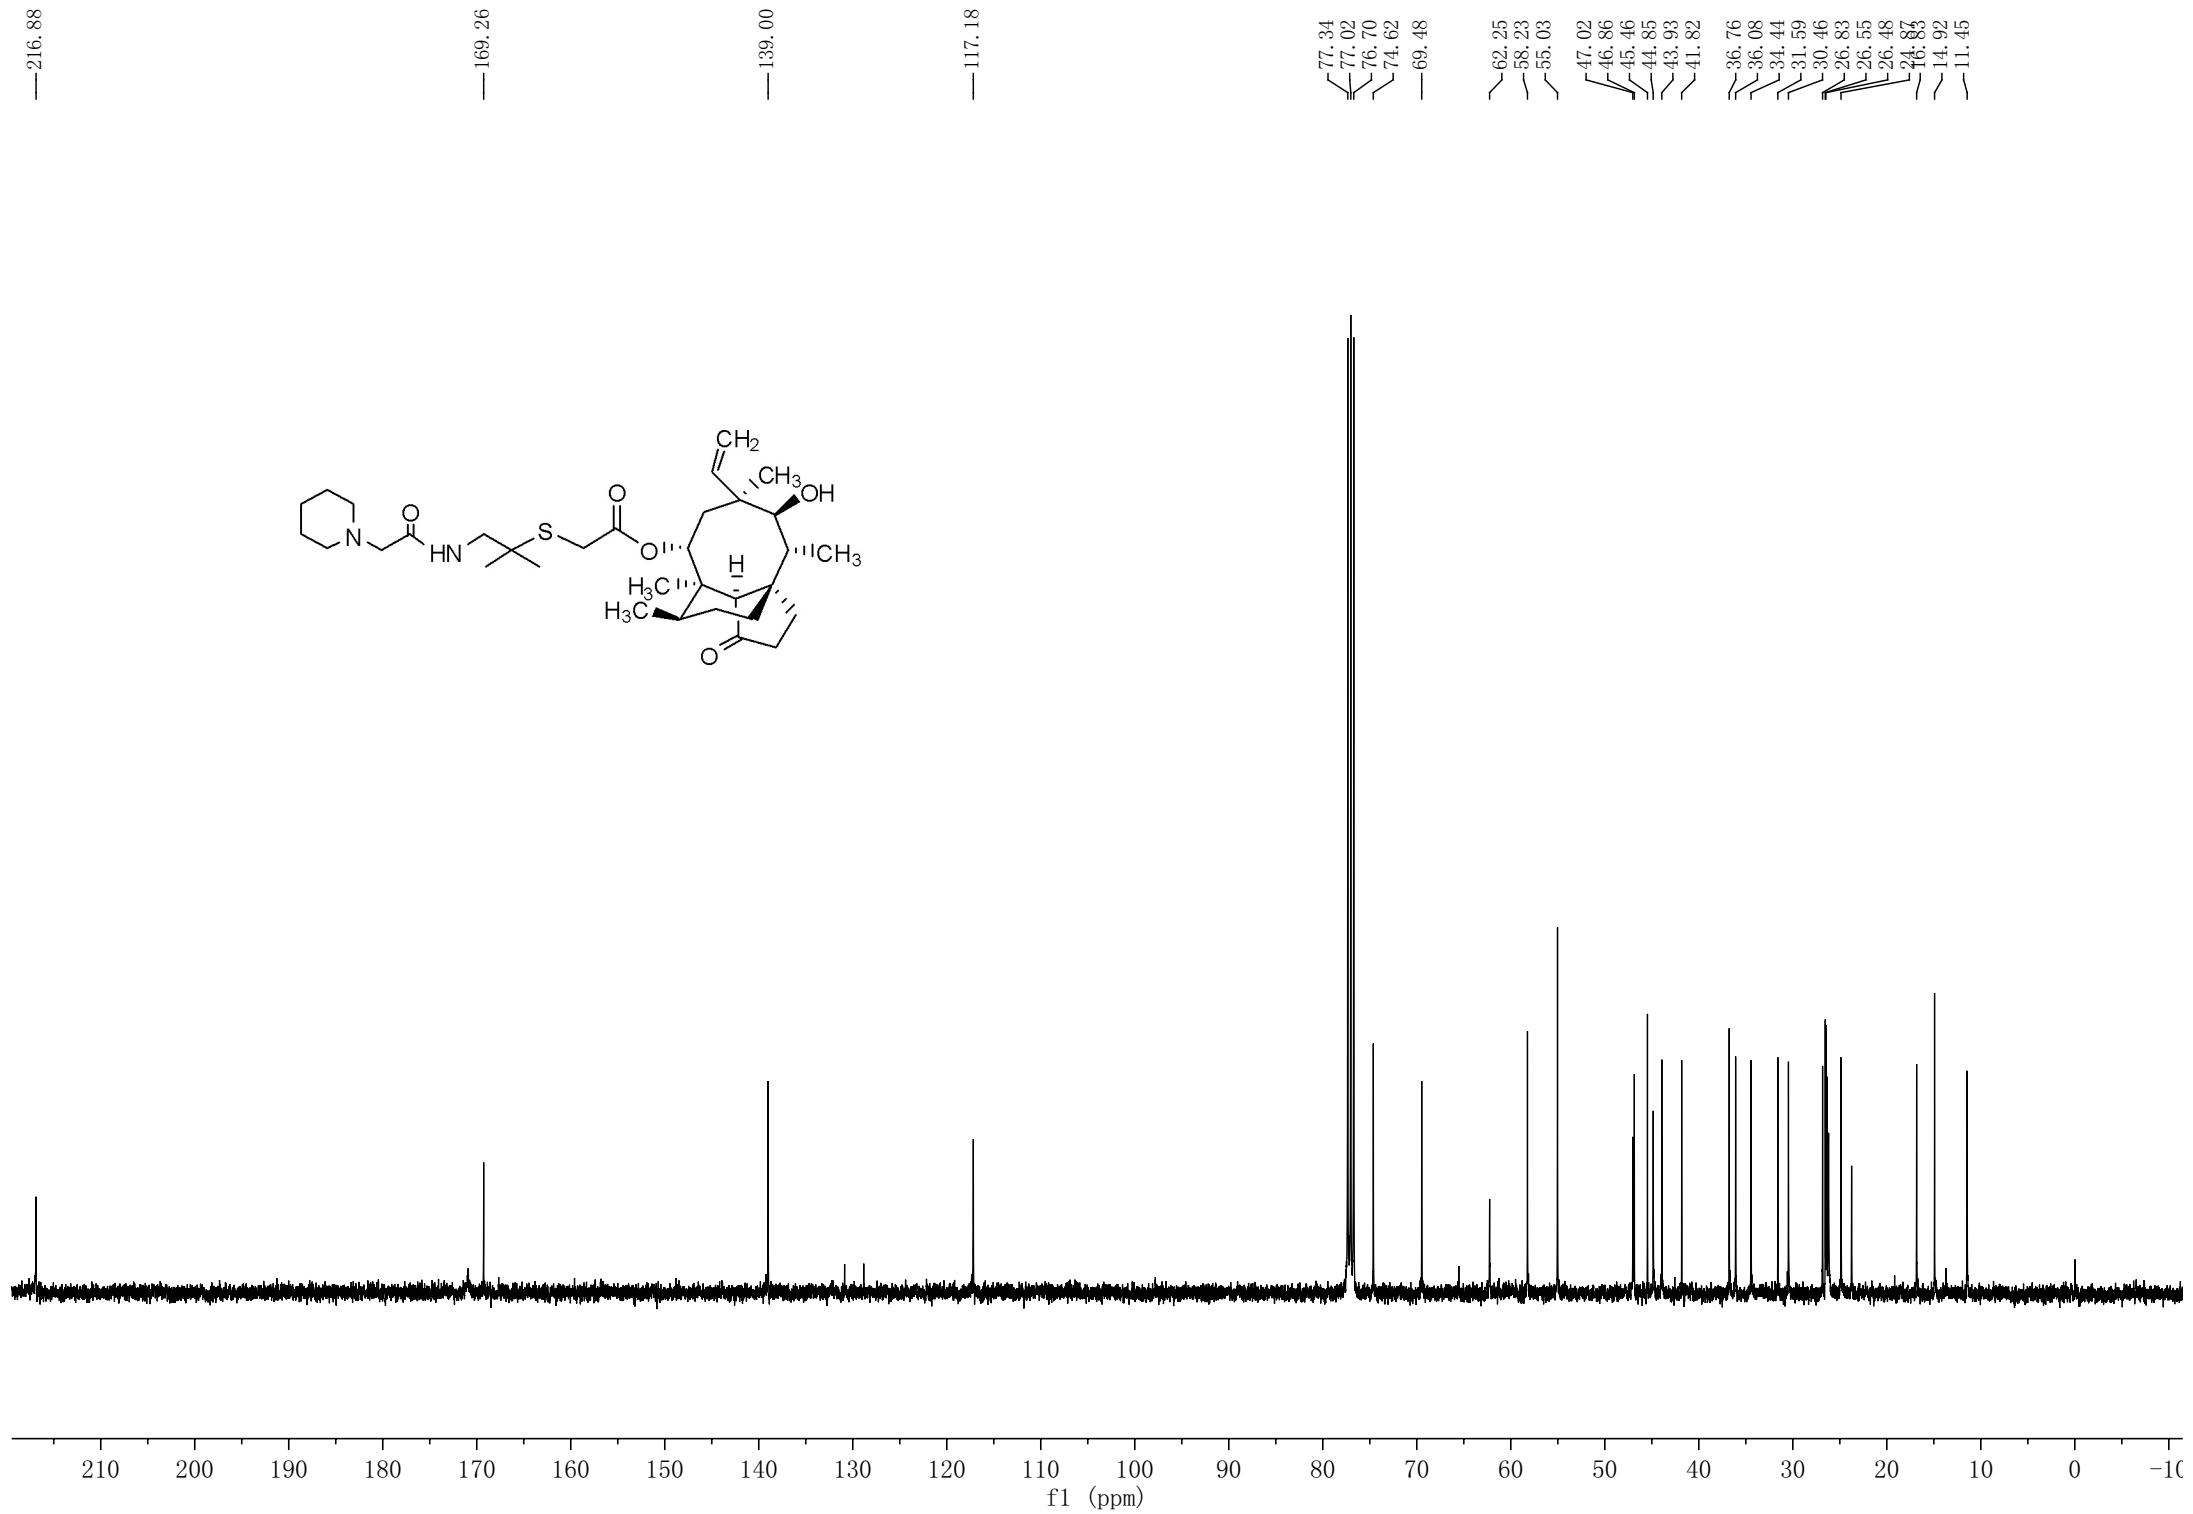

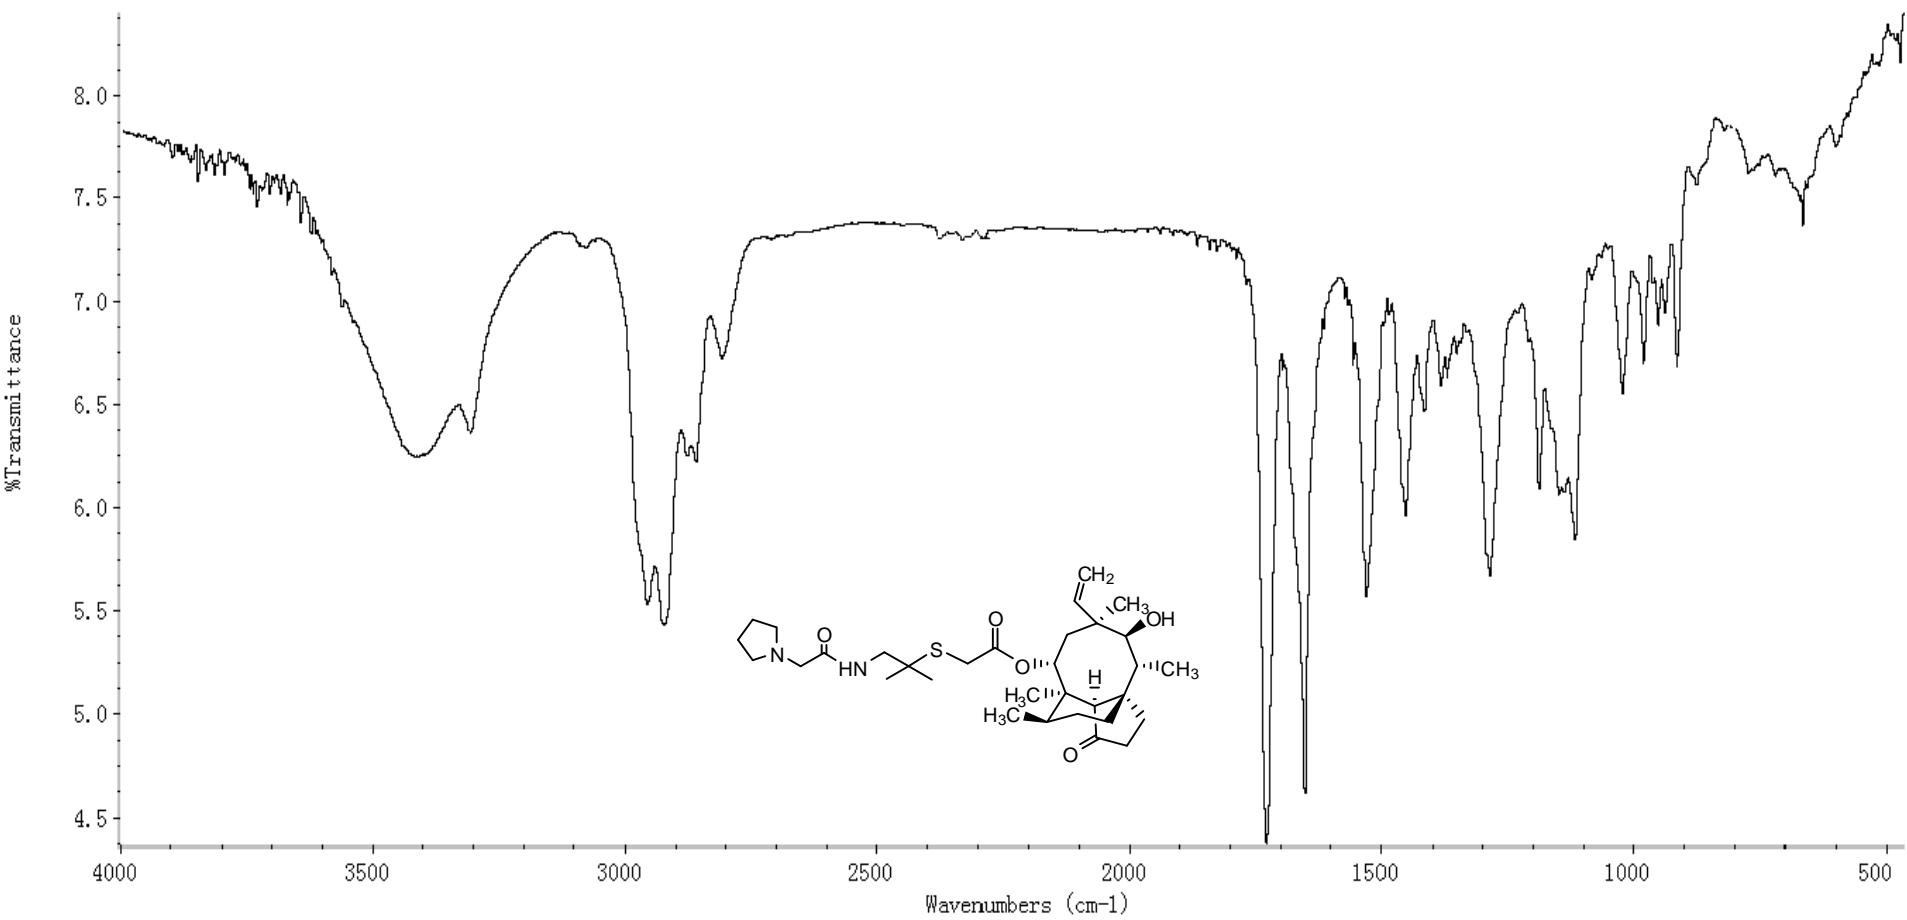

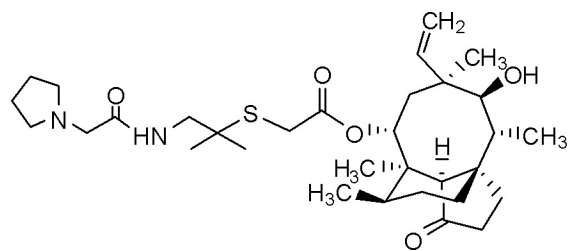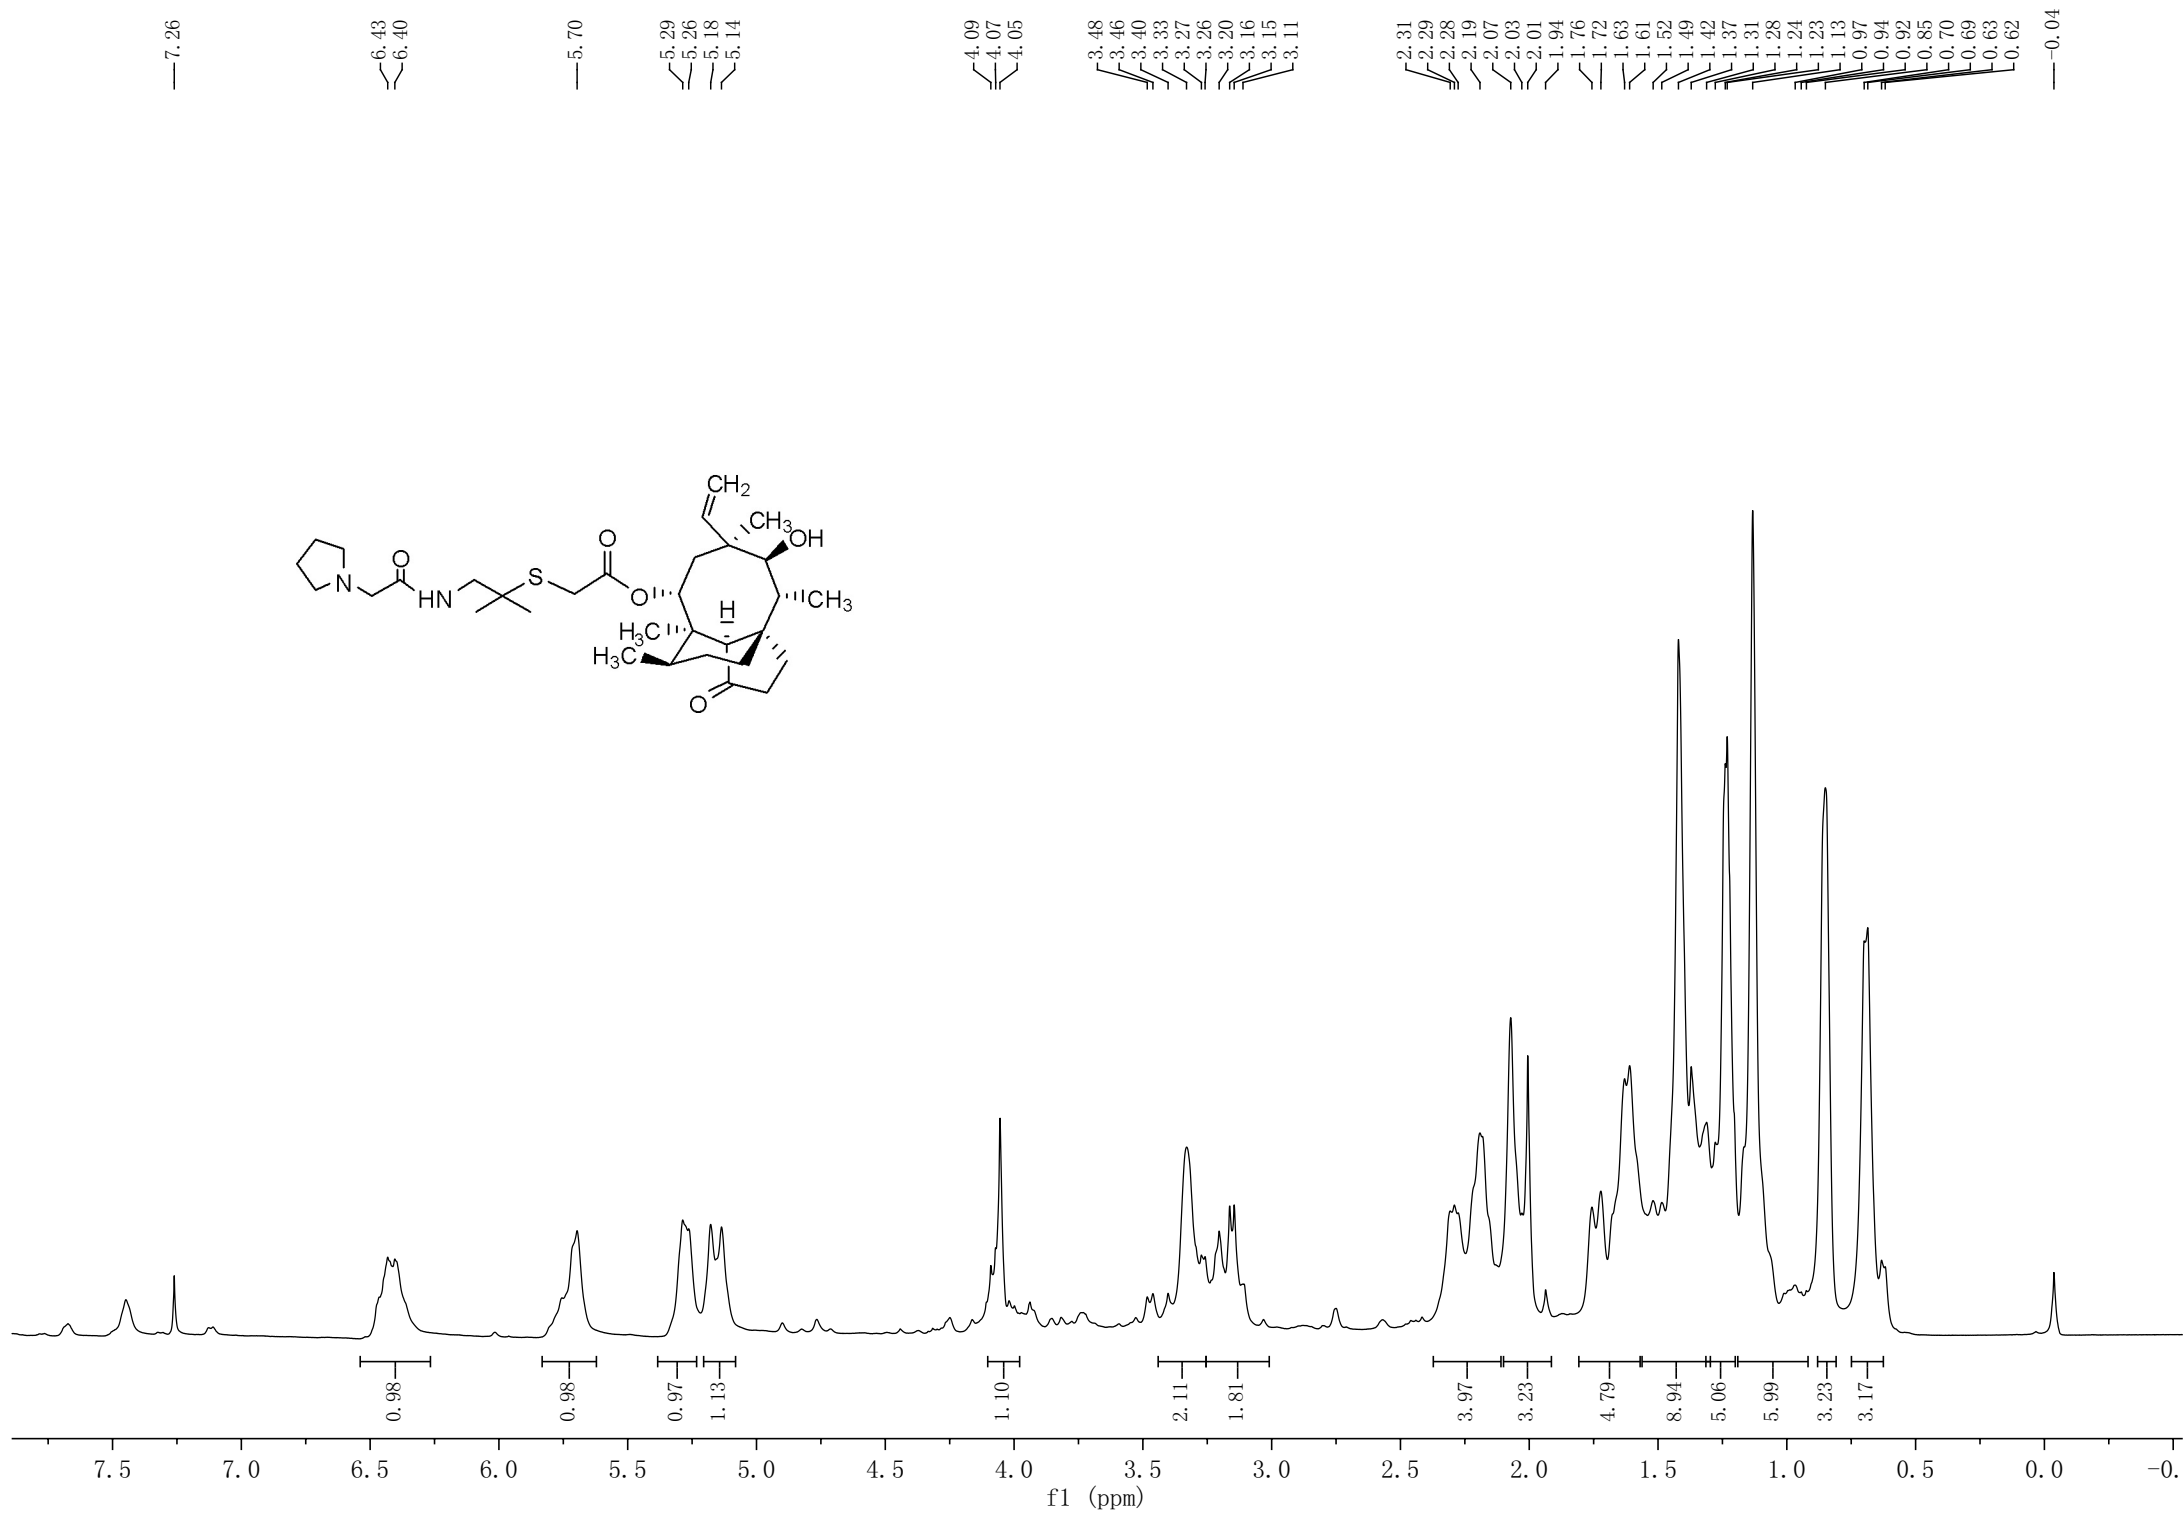

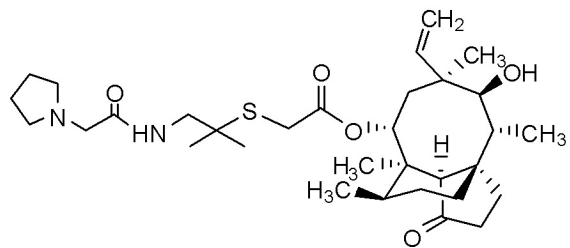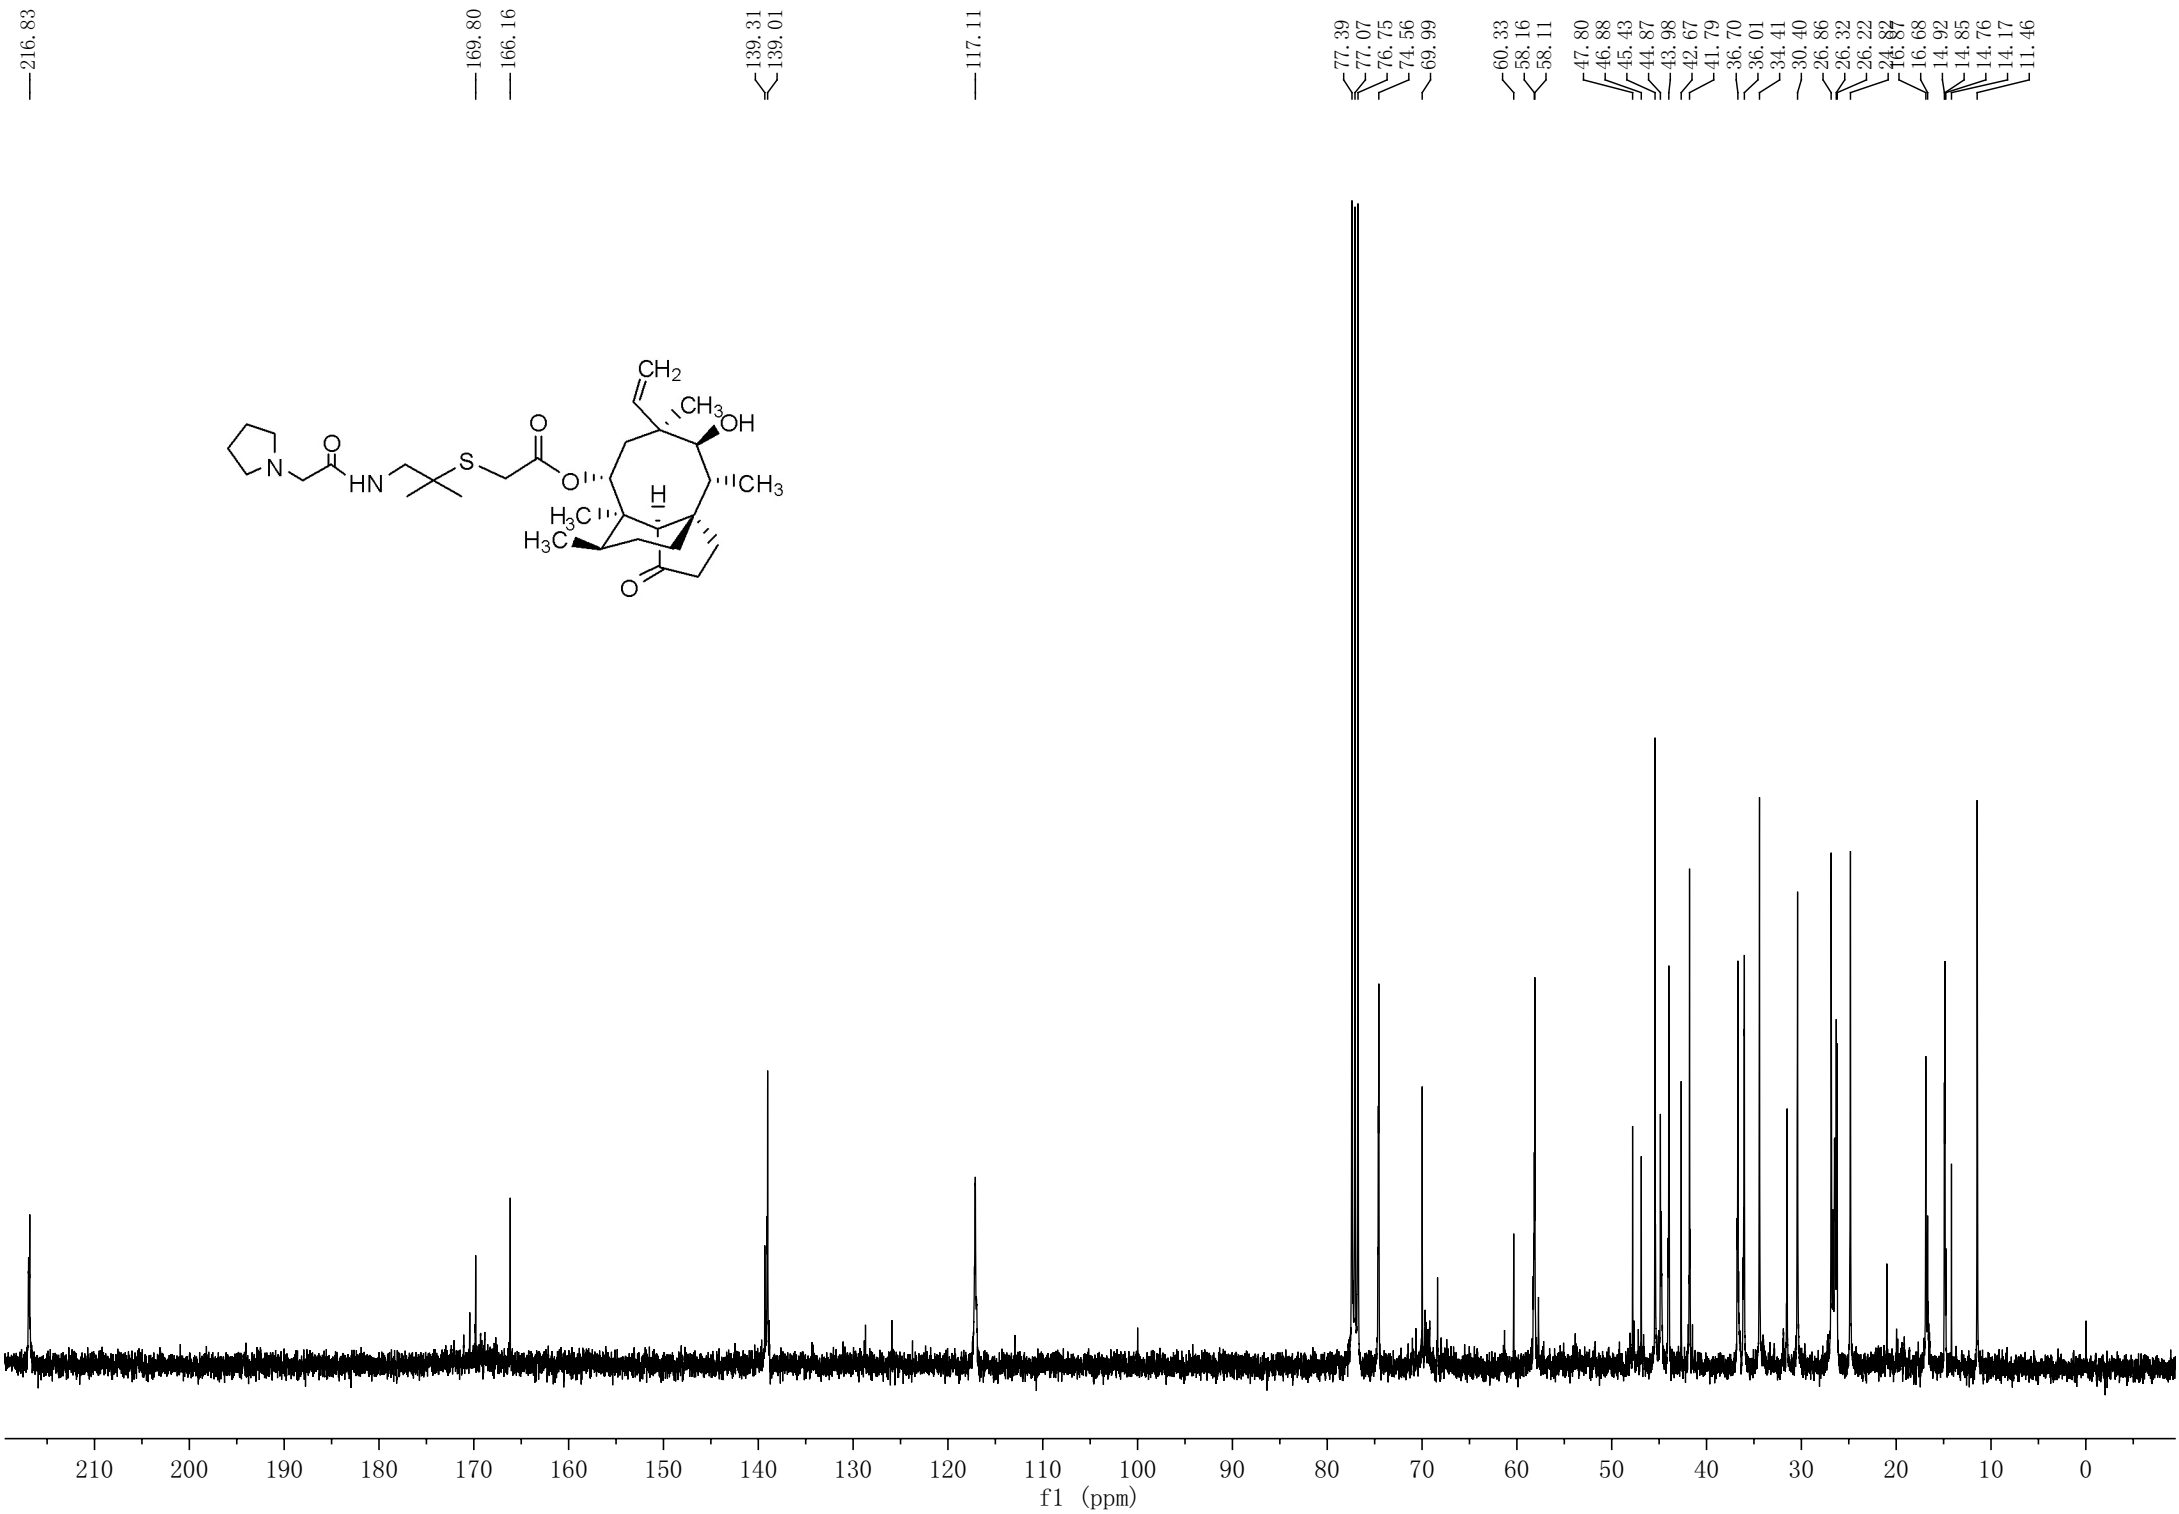



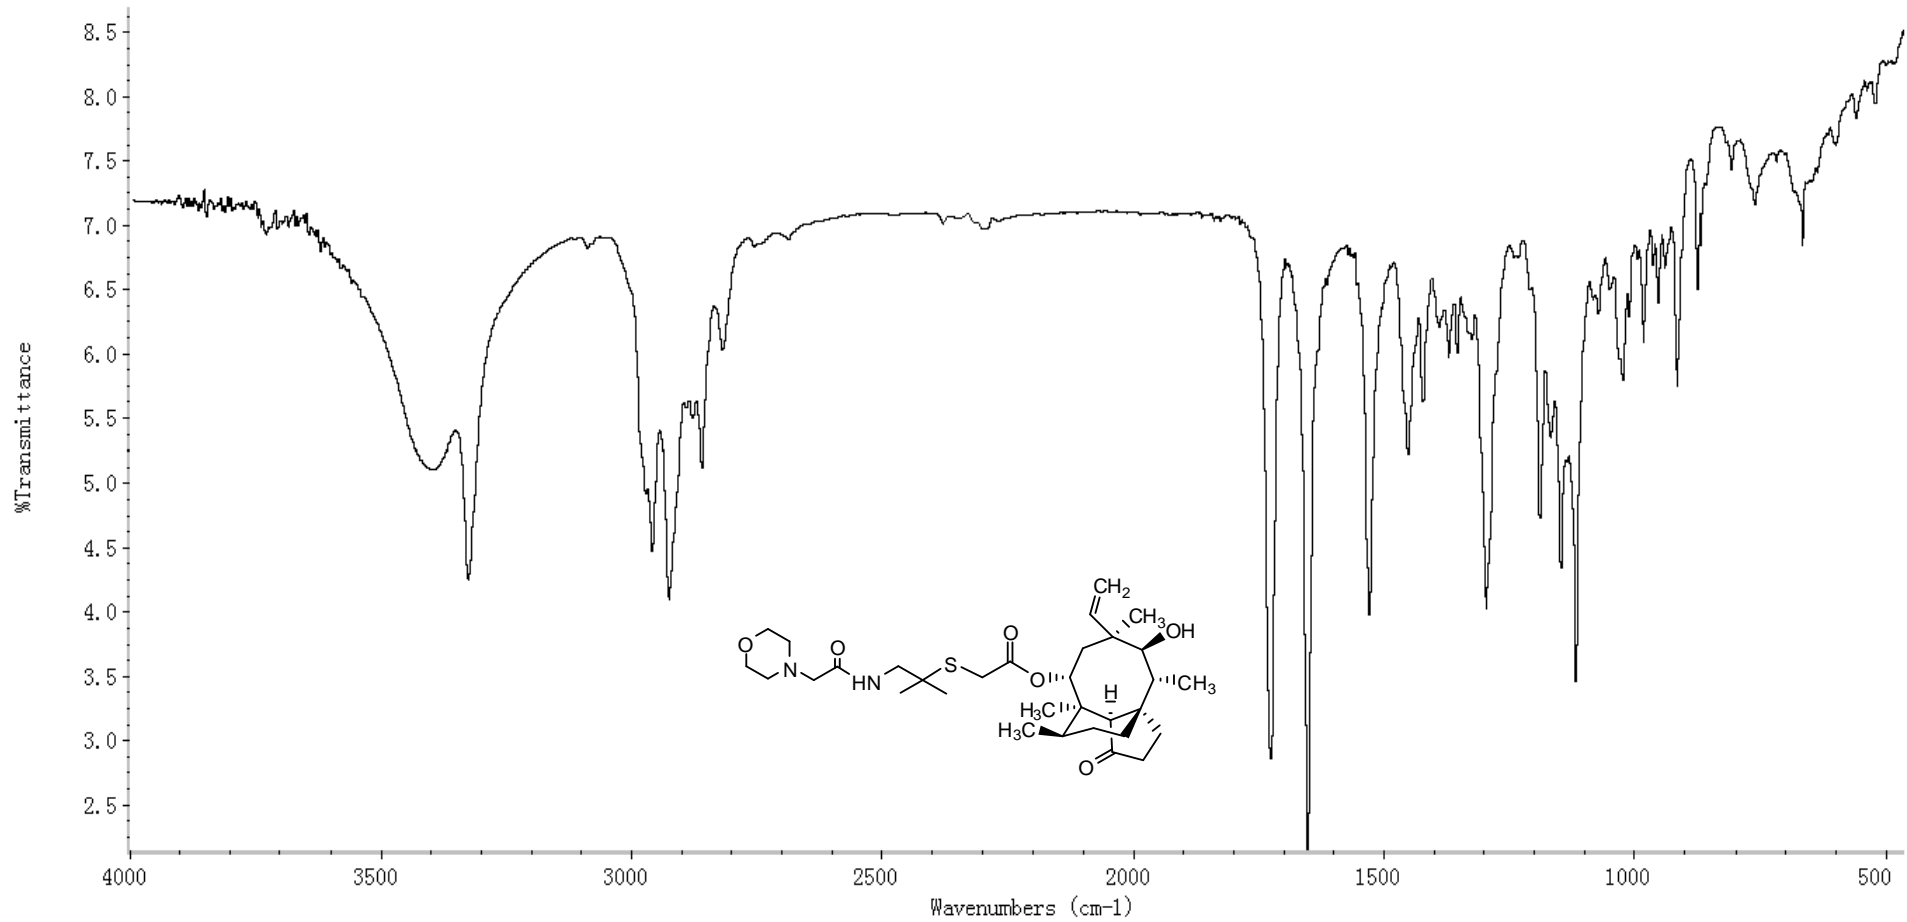

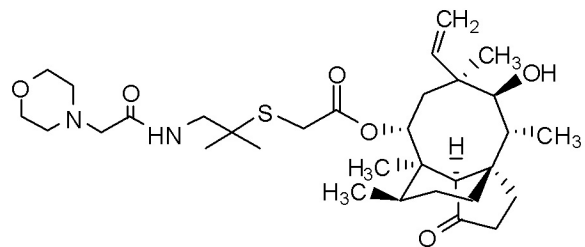

— 7.27

6.44  
6.41  
6.39  
6.36

5.74  
5.72

5.26  
5.23  
5.18  
5.13

3.75  
3.73  
3.72

3.34  
3.28  
3.26  
3.24  
3.23  
3.21  
3.19  
3.17  
3.16  
3.14  
3.12  
2.96  
2.55  
2.54

2.30  
2.20  
2.19  
2.18  
2.09  
2.07

1.63  
1.60  
1.45  
1.45  
1.42  
1.29  
1.25  
1.23  
1.21  
0.88  
0.85  
0.70  
0.68

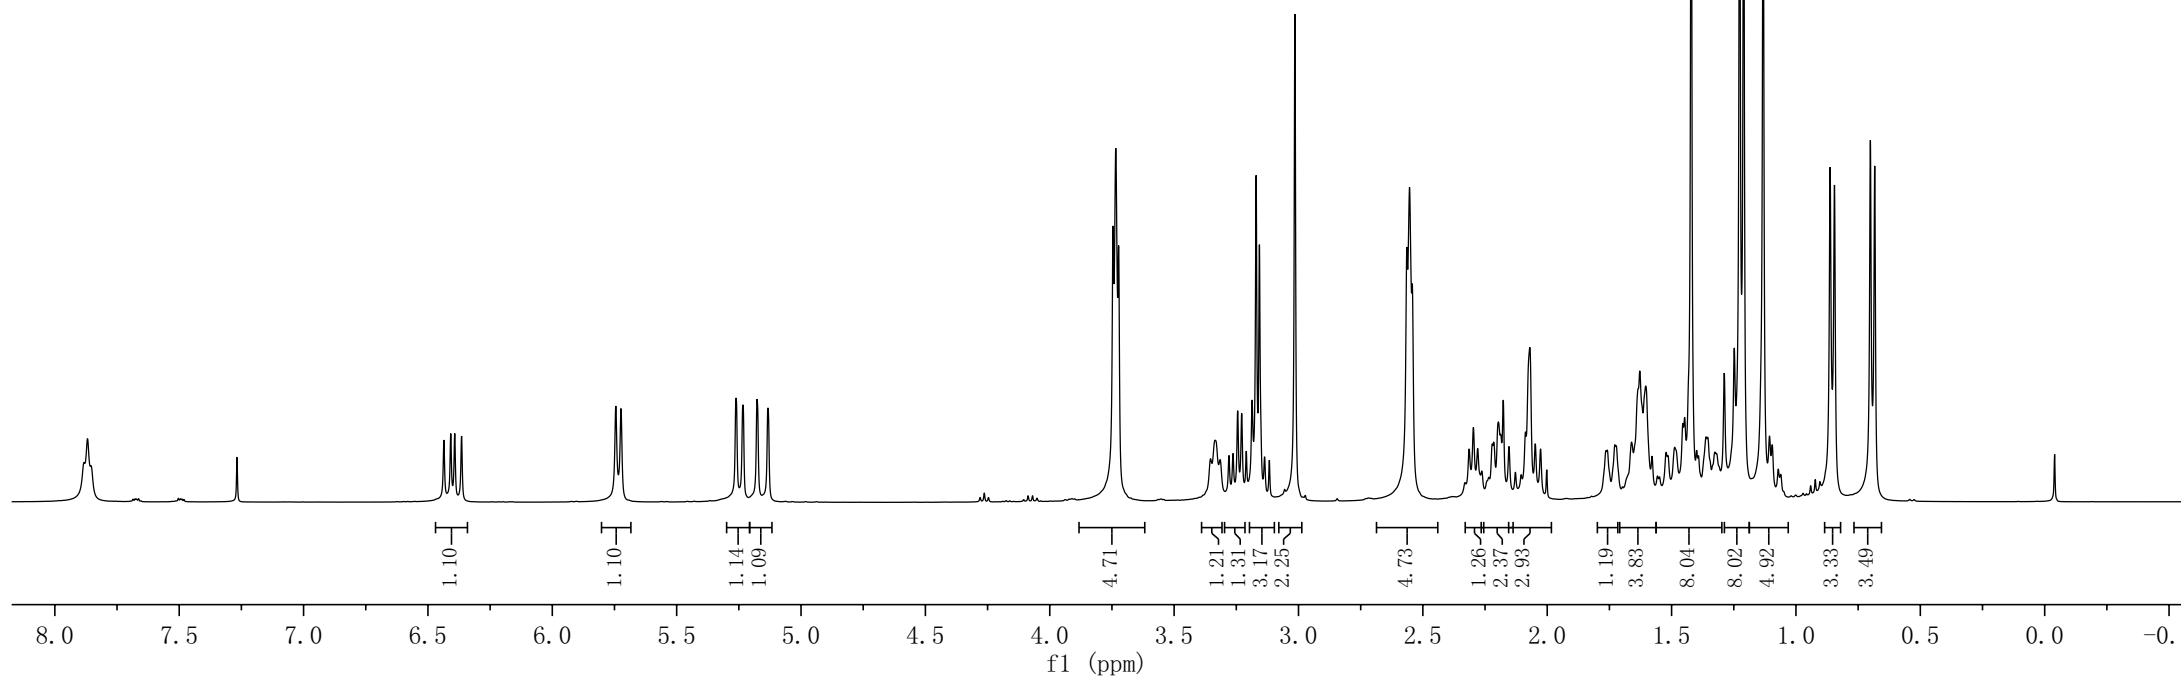

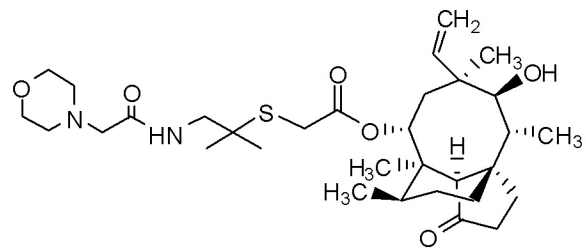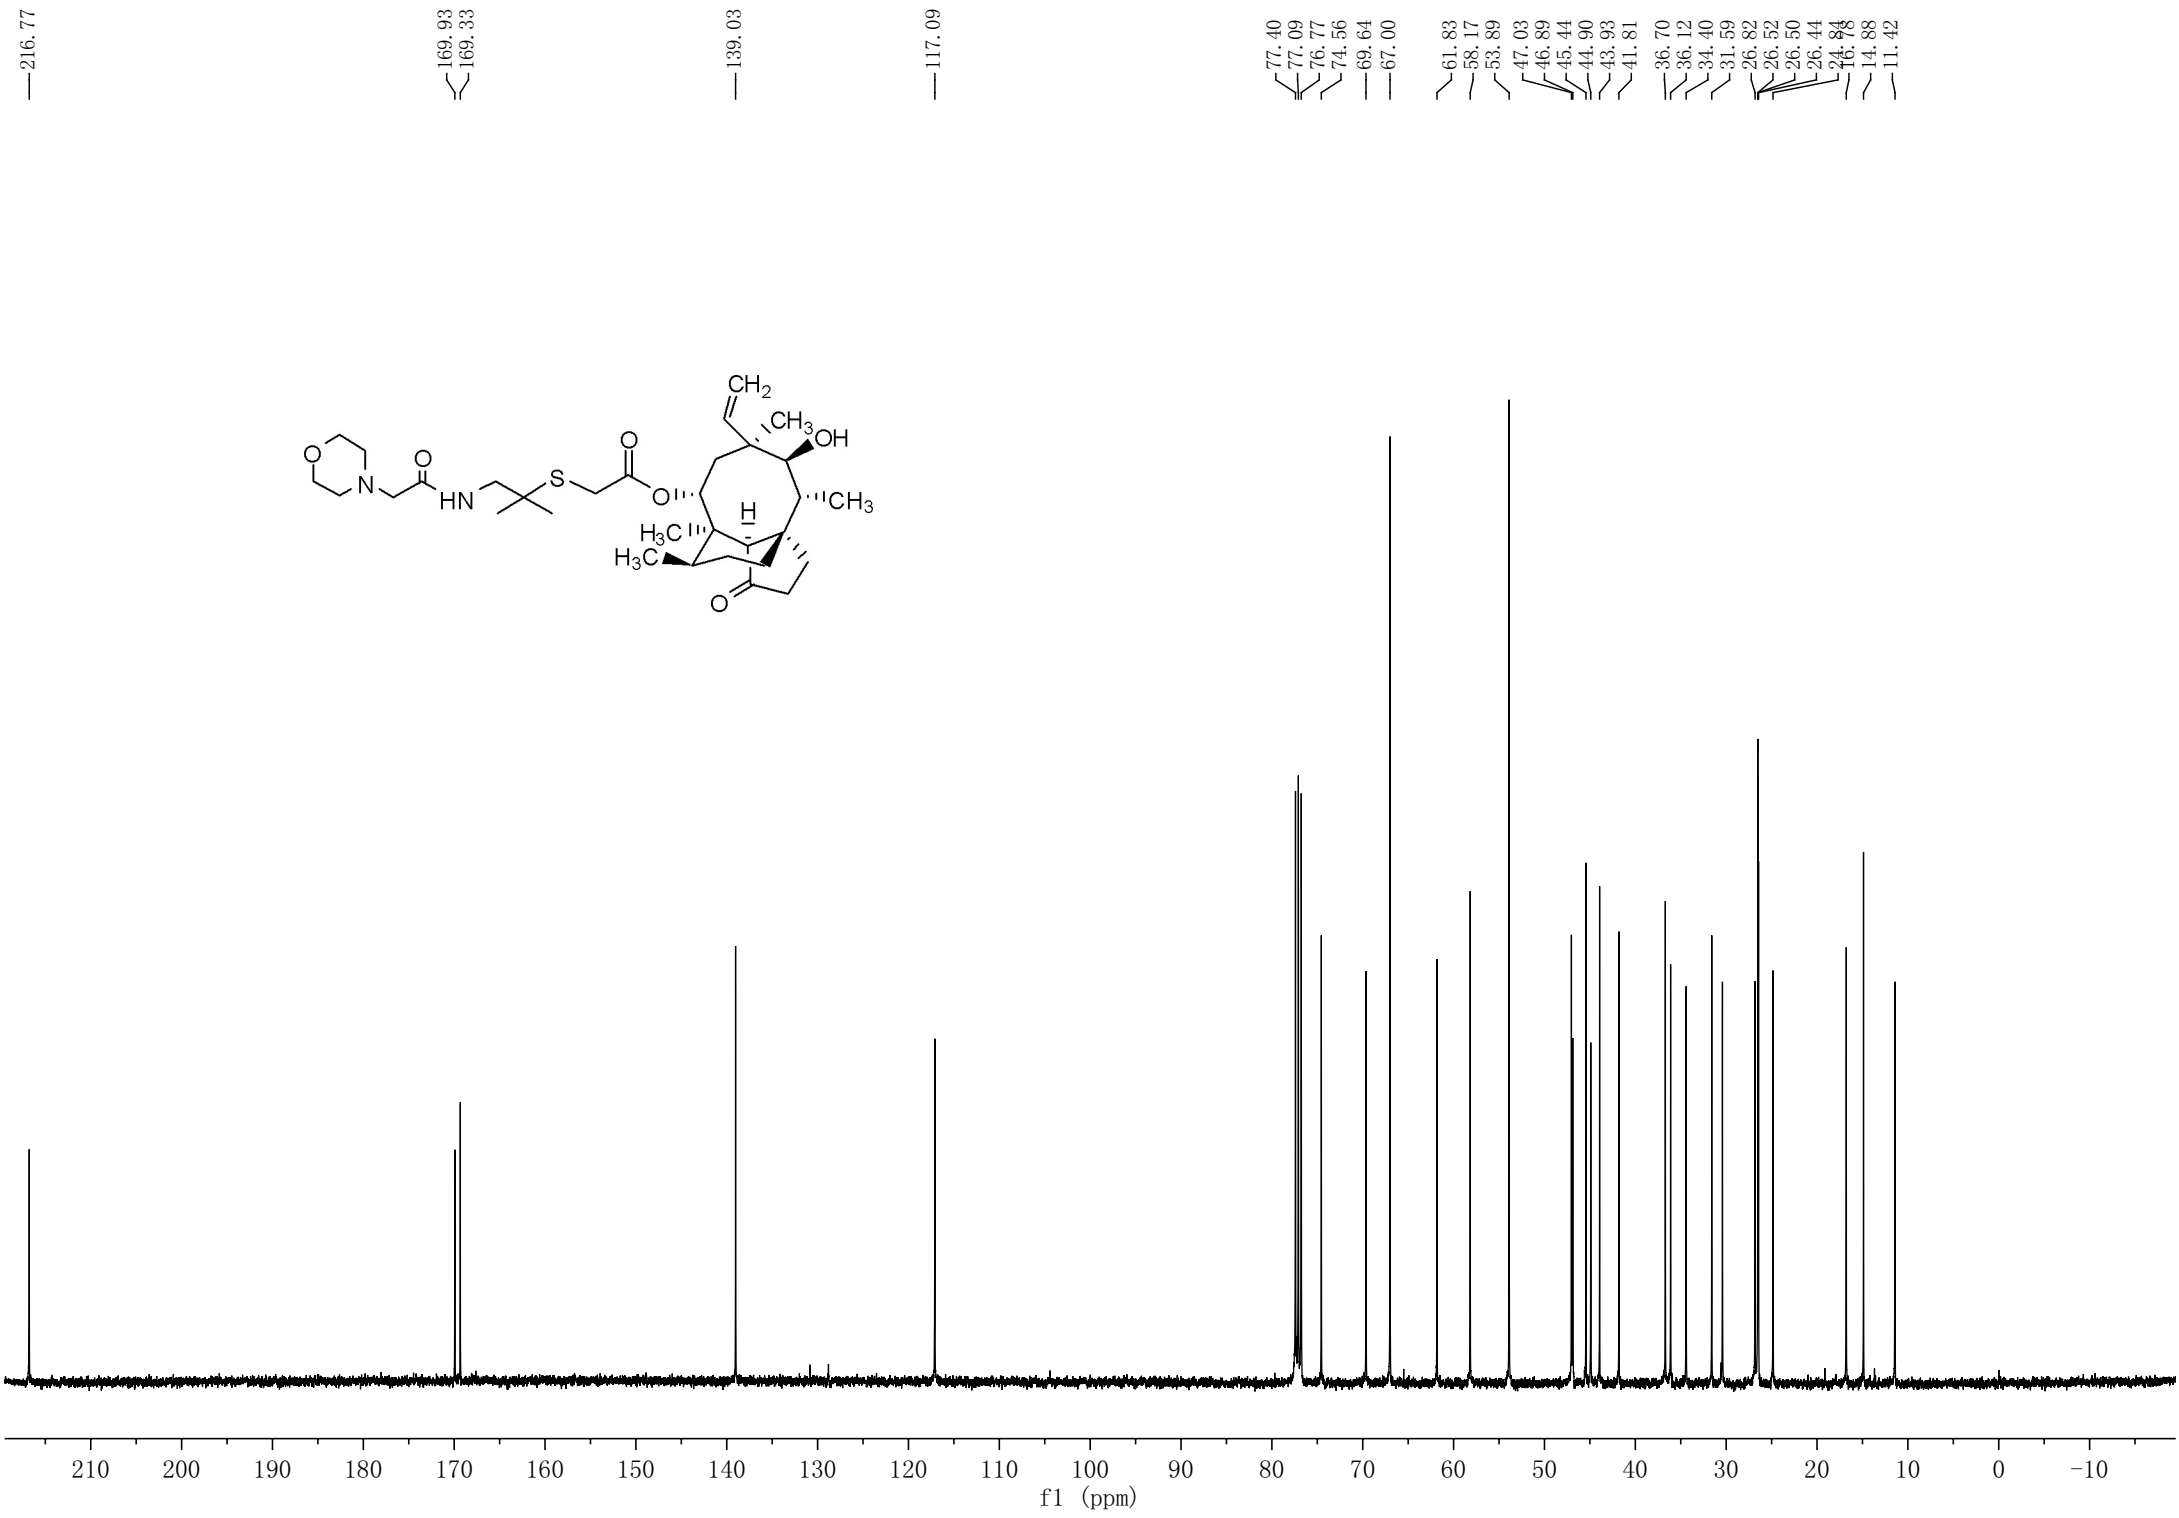

Supplement: pone.0082595.s001.pdf [file pone.0082595.s001.pdf]
